1 **Robust and clinically relevant prediction of response to anti-cancer**  
2 **drugs via network integration of molecular profiles**

3 Marcela Franco<sup>1</sup>, Ashwini Jeggari<sup>2</sup>, Sylvain Peugot<sup>1</sup>, Franziska Böttger<sup>1,3</sup>, Galina Selivanova<sup>1</sup> and Andrey  
4 Alexeyenko<sup>1,4\*</sup>

5 <sup>1</sup> Department of Microbiology, Tumor and Cell Biology (MTC), Karolinska Institutet, Stockholm, Sweden.

6 <sup>2</sup> Department of Cell and Molecular Biology, Karolinska Institutet, 171 77 Stockholm, Sweden.

7 <sup>3</sup> Present Address: OncoProteomics Laboratory, Department of Medical Oncology, VU University Medical  
8 Center, 1081HV Amsterdam, The Netherlands

9 <sup>4</sup> National Bioinformatics Infrastructure Sweden, Science for Life Laboratory, Box 1031, 17121, Solna,  
10 Sweden

11

12 \* To whom correspondence should be addressed. Tel: +46 8 52481513; email:

13 [andrej.alekseenko@scilifelab.se](mailto:andrej.alekseenko@scilifelab.se); address: SciLifeLab, Box 1031, 171 21 Solna, Sweden

14

15

16

17 **ABSTRACT**

18 In order to tackle heterogeneity of cancer samples and high data space dimensionality, we propose a method  
19 NEAMarker for finding sensitive and robust biomarkers at the pathway level. In this method, scores from  
20 network enrichment analysis transform the original space of altered genes into a lower-dimensional space of  
21 pathways, which is then correlated with phenotype variables. The analysis was first done on *in vitro* anti-  
22 cancer drug screen datasets and then on clinical data. In parallel, we tested a panel of state-of-the-art  
23 enrichment methods. In this comparison, our method proved superior in terms of 1) universal applicability to  
24 different data types with a possibility of cross-platform integration, 2) consistency of the discovered correlates  
25 between independent drug screens, and 3) ability to explain differential survival of treated patients. Our new  
26 *in vitro* screen validated performance of the discovered multivariate models. Finally, NEAMarker was the only  
27 method to discover predictors of both *in vitro* response and patient survival given administration of the same  
28 drug.

29

30 **List of abbreviations**

- 31 • AGS, altered gene set (gene set characterizing an individual sample/cell line/patient);
- 32 • FGS, functional gene set (typically a pathway);
- 33 • NEA, network enrichment analysis;
- 34 • PWNEA, NEA at pathway level (i.e. by using multi-gene FGS);
- 35 • GNEA, NEA by using single-gene FGS (i.e. individual network nodes);
- 36 • ORA, overrepresentation analysis of FGS versus AGS;
- 37 • GSEA, gene set enrichment analysis of FGS versus full ranked gene lists;
- 38 • AGSEA, variant of GSEA where genes are ranked by absolute value;
- 39 • ZGSEA, variant of GSEA where genes are ranked by z-score of deviation from cohort mean.

40

41

## 42 INTRODUCTION

43 The problem known as the “dimensionality curse” [1],[2] - when a set of few (tens to hundreds) biomedical  
44 samples are described with a much larger number of molecular variables - undermines robustness of  
45 phenotype predictors. This was aggravated further when novel omics platforms expanded the variable space  
46 from thousands to nearly millions of potentially informative molecular features. In addition, profiling of cancer  
47 samples revealed that genomic alterations across tumors of the same type appear disparate and poorly  
48 overlapping [2]. As a result, variability between cancer samples is often higher than is assumed by the  
49 common parametric statistics [3]. Beyond a few success cases [4],[5] molecular cancer signatures have  
50 been hard to corroborate in a novel, independent cohort. Across a number of meta-analyses, conclusions  
51 about practical applicability of the signatures range from entirely negative [6],[7] to mixed or moderately  
52 positive [8]. The common understanding is that seemingly disparate individual events must be confluent to  
53 certain pathways that represent cancer hallmarks and pathways [9].

54 When, Modeling drug response *in vitro* was questioned by finding that molecular landscapes of cancer cell  
55 lines are be very different from those of original tumors [10]. A later, more comprehensive exploratory  
56 analysis demonstrated overall consistence of molecular aberrations between cell lines and primary tumors  
57 from matching cancer sites [9] – although these authors did not investigate the therapeutic relevance of  
58 discovered *in vitro* correlates. Haibe-Kains and co-authors published a discouraging comparison [11]  
59 between two large *in vitro* screens [12],[13]. After that conclusion and the following polemics [14], the urgent  
60 need in cross-platform and clinically based validation became even more apparent. It is dictated by both  
61 statistical and biological challenges, such as excessive data dimensionality, imperfect analytical tools, the  
62 heterogeneity of cancer genomes, and the downstream diversity of methylation and expression patterns [15].  
63 Authors of one of the most up-to-date investigations still admitted that the ability of cancer cell drug screens  
64 "to inform development of new patient-matched therapies... remains to be proven" [16]. On the clinical side,  
65 oncologists expected reports on patient-specific alterations in the light of knowledge available from  
66 computerized support systems [17]. In our view, these challenges could be most systematically addressed  
67 by summarizing sparse, disparate events at the pathway level via the global interaction network.

68 Adding omics data to clinical variables has demonstrated the potential for prediction of cancer disease  
69 outcome in a DREAM challenge [18]. One particularly winning strategy was to employ multigenic expression  
70 patterns. Such ‘meta-genes’ [19] were, despite the seemingly ‘network-free’ definition, nothing other than  
71 modules in a co-expression network, which allowed dimensionality reduction and a biological generalization.

72 Another DREAM project revealed efficiency of summarizing gene expression in cancer cell lines over  
73 pathways [20].

74 Further, identifying patient sub-categories responsive to a treatment is more challenging than one-  
75 dimensional drug sensitivity or survival analyses. A practical method should profile individuals across the  
76 cohort, so that the profiles can be fit to clinical variables and covariates. Therefore, a crucial feature for  
77 biomarker discovery would be the ability to assign scores to individual samples rather than to derive feature-  
78 pathway associations from the whole data collection. In addition, further sample classification in a flow of  
79 new patients should not require re-running the analysis on the whole cohort, i.e. recalculating the data  
80 space, as is often the case.

81 In this work, we use acronym NEA to refer to a specific approach for network enrichment analysis, which  
82 ascends to the idea of accounting for the node degrees of individual genes [21]. Using that approach of  
83 significance estimation via comparing network connectivity to a null model, NEA [22],[23] can characterize  
84 experimental and clinical samples with pathway scores by accounting for sample-specific gene set  
85 relationships in the global gene interaction network. The pathway-level output is simple, uniform and  
86 statistically sound, so that it could be used in downstream analyses against arbitrary phenotype models. The  
87 ability to summarize rare alterations that cause the recurrent cancer phenotypes into pathway profiles  
88 provides higher statistical power, more information on the underlying biology, and robustness in phenotype  
89 prediction. However neither NEA nor alternative methods of pathway enrichment had been systematically  
90 applied to the task presented above: the discovery of biomarkers suitable for individual outcome prediction.

91 In the first section of Results, we provide a detailed explanation of the method NEAmarker and an instructive  
92 example, both in comparison with alternative methods. A representative set of such methods, was selected  
93 by investigating a wide range of earlier proposed algorithms and approaches. Since they were mostly  
94 designed for purposes different from ours, their applicability was often limited. In Methods (section  
95 “Alternative Methods of Pathway and/or Enrichment Analysis”), we discuss their principles, consider both  
96 applicability to biomarker discovery and software usability, and motivate our choice of methods presented in  
97 Figure 1 and Table 1. Thereby performance of our method is measured in parallel with using original gene  
98 profiles and those alternative enrichment methods: overrepresentation analysis (ORA), gene set enrichment  
99 analysis (GSEA, in two versions: [24], [25]), and signaling pathway impact analysis (SPIA, [26]). The outline  
100 and details of the comparative performance evaluation are reported in Results. More specifically, we: 1)  
101 assess content of relevant information in three published experimental *in vitro* drug screens [12] [13] [27]

102 (dubbed CCLE, CGP, and CTD, respectively), 2) investigate preservation of this content across drug  
103 screens and then in one novel dataset, 3) perform a novel, small scale drug screen and demonstrate that  
104 the pathway-level multivariate models withstand the independent validation, and finally 4) validate the  
105 identified correlations in clinical treatment profiles from TCGA [28] (Table 2).

## 106 RESULTS

### 107 1. Background

108 The main principle of NEA can be understood via comparison to gene set enrichment analysis in its simplest  
109 form, the so called overrepresentation analysis, ORA [29] (Fig. 1A). An experimental or clinical sample can  
110 be characterized by a set of altered genes (AGS), such as top ranking differentially expressed genes, or a  
111 set of somatic mutations, or a combination of these. The other component of the analysis is a collection of  
112 functional gene sets (FGS): pathways, ontology terms, or custom sets of biological importance. Importantly,  
113 FGS collections should summarize existing knowledge, being either expert curated or derived from  
114 experimental data. Enrichment scores of the AGSs can thus be used as the samples' coordinates in the  
115 lower-dimensional FGS space. In ORA, enrichment is measured by the number of genes shared by the FGS  
116 and the AGS, given the sizes of the latter. NEA considers the network environment by counting the **network**  
117 **edges that connect** any genes of AGS with any genes of FGS (Fig. 1D). In both ORA and NEA significance  
118 can be evaluated with appropriate statistical tests. For NEA, this evaluation must be additionally normalized  
119 by topological properties of the network nodes. Due to the presence of different interaction mechanisms in  
120 the global network, NEA does not expect FGS genes to be altered themselves and therefore is capable of  
121 detecting enrichment of e.g. transcriptomics-based AGS in a pathway that operates by other mechanisms,  
122 such as trans-membrane signaling, phosphorylation etc. Compared to ORA, NEA holds other key  
123 advantages, such as exceptionally high power to detect enrichment in a global network, given the latter is  
124 sufficiently dense, i.e. when the median number of edges per gene is around 50. Hence, even smaller gene  
125 sets often connect to each other by multiple edges. An ultimately reduced FGS can even appear as an  
126 individual key network node. This gene-level network analysis, GNEA (Fig. 1E) provides a more focused  
127 alternative to the default analysis at the pathway level, PWNEA (Fig. 1D) and we therefore separately  
128 evaluated performance of PWNEA and GNEA in the present work.

129

130 Figure 1. Rendering biological samples into pathway space with alternative enrichment methods.

131 The placement of three cancer cell lines HuH-7, NCI-H684, and RT-112 in a 2-dimensional space of pathways 'PPAR signaling'  
132 and 'WNT signaling' (KEGG#03320 and KEGG#04310) (A, B, C, and D) or, alternatively, in a space of two key genes from these  
133 pathways (E) was done by using cell line-specific altered gene sets, AGS, which originated from transcriptomics data and  
134 contained 226, 143, and 48 member genes, respectively (AGS of class `significant.affymetrix_ccle`).

135 A. ORA: enrichment of the three AGSs was analyzed against the two pathways (or, more generally, functional gene sets, FGS)  
136 using the overrepresentation analysis. The pathway enrichment scores were calculated from overlap between the gene sets.  
137 For clarity we here denote the pathway size  $N_{PW}$  which corresponds to  $N_{FGS}$  elsewhere in the article. Due to the relatively small  
138 gene sets sizes ( $N_{PW}$  and  $N_{AGS}$ ), a noticeable ( $N_{\cap} > 1$ ) and significant overlap was observed in just one out of six cases, which  
139 could limit the ORA sensitivity.

140 B. GSEA was calculated using the full ranked gene lists from each cell line sample [24].

141 C. SPIA accounted for topological relationships of altered genes within the pathways. More weight was assigned to patterns of  
142 consistent up/down-regulation, i.e. where deregulated genes adjoined in regulatory cascades. Relatively disjoint regulatory  
143 events contributed with lower weights. The gene set submitted to SPIA can be of arbitrary size, up to full length, as in GSEA.  
144 The fold change values determine relative influence of the pathway genes.

145 D. NEA: the coordinates of the three AGSs in the space of two pathways were determined via network enrichment analysis. The  
146 NEA z-scores (on the axes and in yellow boxes) were calculated via network connectivity rates between corresponding AGS and  
147 FGS by taking into account the numbers of AGS-FGS links ( $N_{edges}$  in yellow boxes) and the node topology of the member genes  
148 (Fig. 1 and Methods). The summarized connections between AGSs and FGSs are shown by blue compound edges that  
149 represent multiple individual gene-gene edges in the global network ( $N_{edges} \sim$  line width). Individual edges within AGSs and  
150 within FGSs are not used in the analysis.

151 E. GNEA: since the power of NEA to detect network enrichment was high, it was possible to apply NEA to the cell line AGSs  
152 versus individual gene network nodes WNT2B and APOC3 in the same way as it was done versus pathways in D. Even though  
153 the  $N_{edges}$  values were expectedly smaller than in B, four out of six Z-scores appeared rather high.

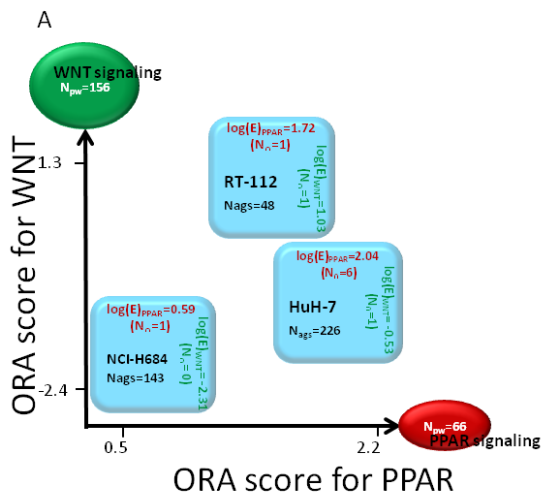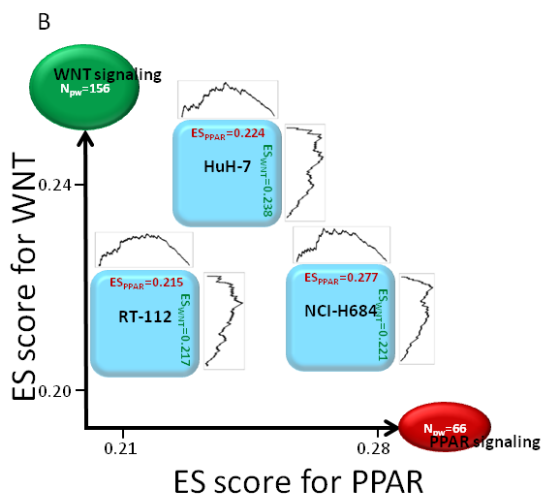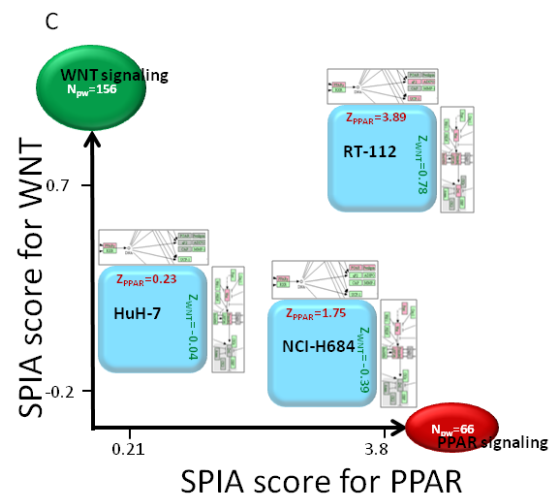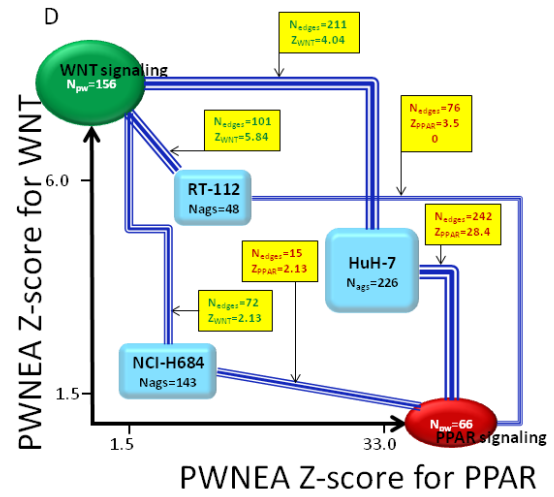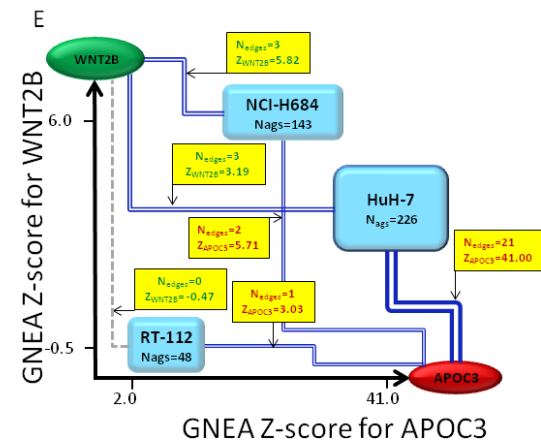

154

155

156 Table 1. Characteristic features of the alternative methods.

| Method        | Type of input data | Allows data type integration | Level of input (samples) | Network analysis | Level of output (features) |
|---------------|--------------------|------------------------------|--------------------------|------------------|----------------------------|
| original data | Any                | -                            | All genes                | -                | [same as input]            |
| ORA           | Any                | +                            | Altered gene sets        | -                | Functional gene sets       |
| AGSEA         | Expression         | -                            | All genes                | -                | Functional gene sets       |
| ZGSEA         | Expression         | -                            | All genes                | -                | Functional gene sets       |
| SPIA          | Expression         | -                            | All genes                | +                | Functional gene sets       |
| PWNEA         | Any                | +                            | Altered gene sets        | +                | Functional gene sets       |
| GNEA          | Any                | +                            | Altered gene sets        | +                | Network gene nodes         |

157

158 The methods in Figure 1 implied different input, processing and output (Table 1). Accordingly, our data  
 159 analysis procedure included the method-specific steps for sample/patient characterization, enrichment  
 160 analysis, and phenotype modeling. In order to maximally adapt GSEA to our applications, we tested two  
 161 different ways of ranking gene lists, AGSEA and ZGSEA (*Methods*) and present respective results  
 162 separately. In sections 3...5 of Results, we report the results of systematic analyses of the experimental  
 163 datasets with the alternative methods in order of increasing complexity (Table 2).

164 Table 2. Steps of analysis using alternative methods from Table 1.

165

| Step | What was evaluated                                                                                          | Figure | Scheme                                                                    |
|------|-------------------------------------------------------------------------------------------------------------|--------|---------------------------------------------------------------------------|
| 1    | Statistical power to detect correlates of drug sensitivity (fraction of significant correlates per dataset) | 3      | Within 3 published <i>in vitro</i> screens; within TCGA clinical datasets |
| 2    | Consistency of the discovered correlates between drug screens: cross-validation                             | 4      | Between 3 published <i>in vitro</i> screens                               |
| 3    | Consistency of multivariate models between drug screens: independent validation                             | 5      | From CTD <i>in vitro</i> screen to the novel ACT screen                   |
| 4    | Agreement between <i>in vitro</i> screens and clinical data                                                 | 6      | From 3 published <i>in vitro</i> screens to TCGA clinical datasets        |

166

167 We begin by introducing an example of data analysis and interpretation (Fig. 2). Using data from the CGP in  
 168 *in vitro* screen, we observed a negative correlation between the PWNEA scores for pathway KEGG#00670  
 169 “One carbon pool by folate” for cell line AGS features `significant.affymetrix_ccle`, on the one hand,  
 170 and sensitivity to methotrexate on the other hand (Spearman rank  $R = -0.248$ ;  $p(H_0) = 2.37e-06$ ). The  
 171 relatively low magnitude of the correlation is typical of such analyses and was explained by minor fractions of  
 172 responders among all tested genotypes [14]. We compared cell lines which combined lowest sensitivity to  
 173 methotrexate with highest PWNEA scores for KEGG#00670 (dubbed here Drug-/PW+) versus those  
 174 possessing highest sensitivity and lowest PWNEA scores (Drug+/PW-) (ten cell lines in each set). Figure 2



175 (A,B,D,E) displays the network connectivity of the FGS KEGG#00670 “One carbon pool by folate” with AGSs  
176 for two cell lines (MPP89, ECGI10) of group Drug-/PW+ and two cell lines (RS411, A2780) of group  
177 Drug+/PW-. As an example, MPP89 obtained an NEA score of  $Z=8.09$  (NEA FDR=4.3e-10; see details in  
178 Methods) because there were  $n_{\text{AGS-FGS}} = 19$  edges in the network between its AGS and the FGS, against  
179  $\hat{n}_{\text{AGS-FGS}} = 4.89$  edges expected by chance. For comparison, the NEA Z-score for A2780 was as low as -  
180 0.77 and insignificant. The negative sign indicated that the number of network edges  $n_{\text{AGS-FGS}} = 10$  between  
181 the AGS and FGS was lower than the value expected by chance,  $\hat{n}_{\text{AGS-FGS}} = 12.54$ . The expected numbers  
182  $\hat{n}_{\text{AGS-FGS}}$  differed between MPP89 and A2780 due to the difference in the cumulative AGS degrees  
183  $N_{\text{AGS}}=2268$  and  $N_{\text{AGS}}=5823$ , respectively (shown in Fig. 2F). The high score for MPP89 (Fig. 2A) was likely  
184 influenced by the network node of formimidoyltransferase cyclodeaminase FTCD, which provided 14 out of  
185 the 19 edges. Although enrichment against the same FGS might have been enabled via entirely different  
186 AGS member genes, we note that it was not the case here: FTCD was a member of four out of the ten AGS  
187 of the group Drug-/PW+. Methotrexate is a cytostatic drug that inhibits dihydrofolate reductase, thereby  
188 blocking synthesis of tetrahydrofolate, the downstream production of folic acid, and finally that of thymidine.  
189 We can therefore hypothesize that overexpression of FTCD, an enzyme controlling the interconversion  
190 between formimidoyltetrahydrofolate and tetrahydrofolate [30], might have rescued the thymidine production  
191 by supplying extra tetrahydrofolate [31]. Since FDCD itself is a member of the “One carbon pool by folate”,  
192 the pathway could be, in principle, detected by another enrichment algorithm. But how have the alternative  
193 tested enrichment methods dealt with this pattern? Any noticeable correlations were absent. This might be  
194 explained by the fact that FDCD was the only consistently deregulated gene out of the whole pathway, which  
195 was a challenging situation for each of these methods. ORA is not well fit for cases of such an overlap (N=1).  
196 In GSEA, enrichment via a single highly ranked list member is usually not detectable. In its turn, SPIA could  
197 not gain enough statistical power in absence of consistent (adjoining) patterns of dysregulation in multiple  
198 genes. Finally, expression of FTCD itself did not significantly correlate with methotrexate sensitivity in CCLE  
199 and CGP transcriptomics datasets. More broadly, we did not find any genes of the “One carbon pool by  
200 folate” and the adjoining pathway KEGG#00790 “Folate biosynthesis” which would significantly (by requiring  
201 q-value <0.05) correlate with methotrexate sensitivity at either gene expression or somatic mutation levels.

202 For comparison, AGS of the other resistant cell line, ECGI10, did not share any genes with the target  
203 pathway (Fig. 2B), although still received a higher NEA score. In this case, the summarized connectivity was  
204 not dominated by a single network node of the AGS or of the FGS. Here the drug resistance could potentially  
205 have been mediated by the DNA repair protein XRCC5 or by the adenosylhomocysteine hydrolase AHCY,

206 which were earlier reported to be implicated in methotrexate resistance [32] and folate metabolism [33],  
207 respectively. Unlike the upregulated FTCD in MPP89, both these genes were strongly downregulated in  
208 ECGI10. This emphasizes another feature of NEA: genes may be included into AGS due to alterations in an  
209 arbitrary direction, i.e. both over- and under-expression, hyper- and hypo-methylation, increased and  
210 decreased copy number etc. Therefore higher and, respectively, lower NEA scores cannot be traditionally  
211 interpreted as activation or suppression of the given pathway (FGS) but rather indicate a general 'pathway  
212 perturbation'. Hence the pathway "One carbon pool by folate" was unperturbed in the low-scoring cell lines  
213 A2780 and RS411, i.e. the latter did not exhibit features that could connect specifically to the pathway.

214

215 Figure 2 Network enrichment analysis of four cell line AGSs with differential response to methotrexate.

216 While using AGSs of class `significant.affymetrix_ccle`, the response of cancer cell lines to methotrexate in  
 217 CGP screen correlated with NEA scores (pane F) in regard to FGS “One carbon pool by folate” (pane C). The  
 218 methotrexate-resistant cell lines MPP89 and ECGI10 (panes A and B) received higher NEA scores since the numbers  
 219 of edges  $n_{AGS-FGS}$  connecting them to the FGS significantly exceeded those expected by chance,  $\hat{n}_{AGS-FGS}$  (52 vs  
 220 26.02 and 19 vs. 4.89, respectively; pane F). For comparison, the sensitive lines RS411 and A2780 (panes D and E)  
 221 had fewer edges than expected (15 vs 19.93 and 10 vs. 12.54, respectively) and therefore received lower, negative  
 222 scores.

223 The table in F and the sub-networks in A, B, D, and E were created via the web-site for interactive NEA  
 224 <https://www.evinet.org/>.

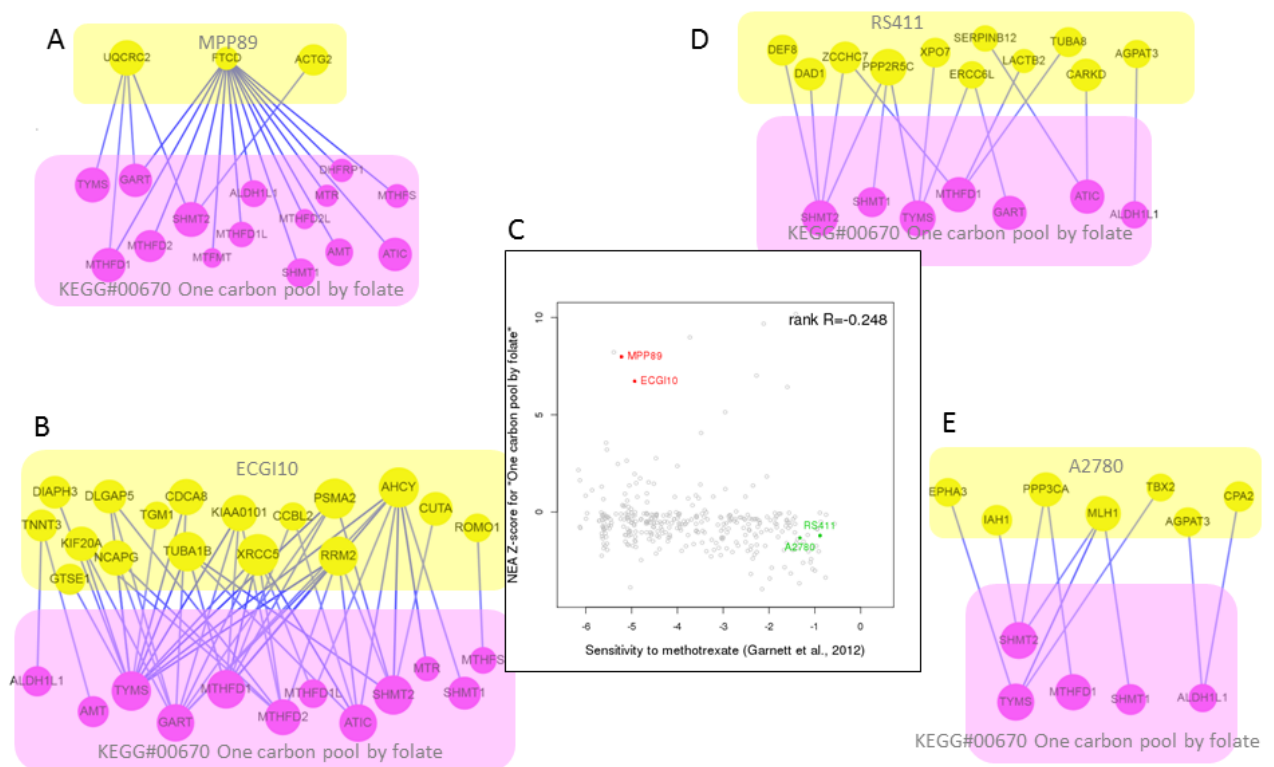

$$\chi^2 = \frac{(n_{AGS-FGS} - \hat{n}_{AGS-FGS})^2}{\hat{n}_{AGS-FGS}} + \frac{(!n_{AGS-FGS} - !\hat{n}_{AGS-FGS})^2}{! \hat{n}_{AGS-FGS}}; \quad \hat{n}_{AGS-FGS} = \frac{N_{AGS} * N_{FGS}}{2 * N_{total}}$$

F

| AGS    |             |             | FGS        |             |             | Network enrichment analysis |                     |                          |              |                  | ORA        |
|--------|-------------|-------------|------------|-------------|-------------|-----------------------------|---------------------|--------------------------|--------------|------------------|------------|
| Name   | $N_{nodes}$ | $N_{edges}$ | Name       | $N_{nodes}$ | $N_{edges}$ | $n_{AGS-FGS}$               | $\hat{n}_{AGS-FGS}$ | P-value (from $\chi^2$ ) | FDR (from P) | Z-score (from P) | Overlap, N |
| ECGI10 | 68          | 12107       | KEGG#00670 | 18          | 6178        | 52                          | 26.08               | 3.90E-08                 | 5.50E-07     | 7.38             | 0          |
| MPP89  | 24          | 2268        | KEGG#00670 | 18          | 6178        | 19                          | 4.89                | 1.70E-10                 | 4.30E-10     | 8.09             | 1          |
| A2780  | 127         | 5823        | KEGG#00670 | 18          | 6178        | 10                          | 12.54               | 0.47                     | 1            | -0.77            | 0          |
| RS411  | 116         | 9253        | KEGG#00670 | 18          | 6178        | 15                          | 19.93               | 0.27                     | 1            | -0.69            | 0          |

225

226

## 227 **2. Construction of sample-specific AGS**

228 In order to analyze data from the *in vitro* cancer cell screens and the primary tumor samples (TCGA) in the  
229 same manner, we constructed AGSs by following the same platform-specific approaches. Intuitively, having  
230 an AGS that is too big or too small could deteriorate specificity or sensitivity of NEA. Therefore, in order to  
231 prove that differences are not due to selecting AGS genes in a specific way, we tested and compared a  
232 number of options for AGS compilation. Mutation-based AGSs were created by first listing all point-mutated  
233 genes in each given sample (which might include hundreds and even thousands of passenger mutations)  
234 and then retaining only those with significant network enrichment against the rest of the set. This approach  
235 [34] had been proposed for distinguishing between driver and passenger mutations - hence the filtering  
236 should reduce noise by enriching AGSs in driver genes. Next, AGSs from gene copy number and expression  
237 data included genes most deviating from the cohort means. This was achieved by using one of the three  
238 alternative algorithms (see Methods). Again, even such deviant gene sets could still be too large, e.g. due to  
239 listing copy number-alterations over extended chromosomal regions. In order to compact these, alternative  
240 AGS versions were derived by retaining only genes with significant network enrichment for signaling and  
241 cancer pathways or for the mutation-based AGS of the same sample, which reduced the AGS lists 3-10 fold.  
242 An alternative to using gene copy number data would be to account for respective mRNA expression levels.  
243 While this approach is subject of ongoing discussion, we have observed [34] that many known copy  
244 number drivers did not exhibit this correlation and therefore we decided not to filter copy number data by the  
245 gene expression feature. Finally and as an extra option, we merged platform-specific AGSs into combined  
246 AGSs.

## 247 **3. Statistical power to detect correlates of drug sensitivity**

248 The goal of this first, exploratory analysis was to compare the different methods and feature classes in their  
249 ability to explain the differential drug sensitivity. To this end, we counted features significantly associated with  
250 a phenotype after adjusting the respective p-values for multiple testing. For example (Suppl. Fig. 1), we  
251 analyzed associations between point mutation profiles of cancer cell lines [35] and cell lines' sensitivity to  
252 each of the 203 anti-cancer drugs from Basu et al. [27]. The fraction of low p-values (e.g.  $p(H_0) < 0.001$ ) in  
253 the total number of statistical tests did not exceed that expected in absence of any associations and  
254 therefore no genes received q-values (adjusted p-values) [36] below 0.05. On the contrary, the correlation  
255 analysis of gene expression [12] against the same drug sensitivity profiles discovered nearly 15,000 patterns  
256 of association between gene expression and drug sensitivity (out of in total  $18,900 \times 203 = 3,836,700$  tests)

257 with  $p(H_0) < 0.001$ . After the adjustment, more than 2500 of these gene-drug pairs remained significant at  $q <$   
258 0.001. These two examples demonstrate how dramatically the information content could vary depending on  
259 the feature type and data origin.

260 Applying this approach to the *in vitro* drug screen data, we evaluated features of different types and classes.  
261 Respectively, in TCGA data we measured correlations of features with survival of patients who received one  
262 of the 42 frequently used drugs in any of the eight cohorts. We systematically compared different feature  
263 types, i.e. original data from high-throughput platforms and NEA scores as well as classes within the types  
264 (e.g. transcriptomics data from Affymetrix vs. Agilent vs. RNA sequencing). We also analyzed the relative  
265 performance of different AGS classes.

266 Overall, the NEA scores at both pathway level (PWNEA) and individual gene node level (GNEA) contained  
267 either approximately the same or larger amounts of information on drug sensitivity compared to the original  
268 gene profiles (Fig. 3). In the drug screen data analysis, the ORA, PWNEA, and GNEA features performed  
269 apparently better than the respective original point mutation, gene copy number, and gene expression data.  
270 In the TCGA data analysis, the advantage of PWNEA and GNEA over both ORA and original gene profiles  
271 for particular drugs was even more pronounced, although not always overall significant. Among the platforms  
272 for the *in vitro* screens, Affymetrix data by far outperformed mutation data, copy number, and combined  
273 AGSs. In TCGA datasets, RNA sequencing performed better than Affymetrix (the former data was not  
274 available for the cell lines). In general, transcriptomics datasets much more frequently manifested  
275 correlations with drug sensitivity than gene mutations and copy number datasets (Suppl. Fig. 3). While this  
276 observation is not new [9], the most obvious explanation should be that most of the genome alterations  
277 were insufficiently frequent for the statistical tests. As an example, less than 10% of the genes in the BRCA  
278 cohort had point mutations in more than 1% of the tumors and therefore the analysis did not gain enough  
279 statistical power. mRNA expression profiles were, on the contrary, available for most of the genes. We also  
280 assessed relative performance of the different AGS classes. From each dataset with continuous values we  
281 created AGSs of fixed size (`top.200` and `top.400`) as well as sets of variable size where genes were  
282 included based on significance as referred to the cohort mean (`significant`) and, in addition to the latter,  
283 tested for network enrichment toward cancer gene sets (`significant.filtered.mini`) or any signaling  
284 pathways (`significant.filtered.maxi`). As illustrated in Supplementary Figure 3, the different classes  
285 yielded variable results. We evaluated consistency and significance of these differences using the same  
286 Kolmogorov-Smirnov test as in Figure 3 on the gene copy number and expression datasets for cell lines and  
287 TCGA samples (Suppl. Table 1). This evaluation, however, did not lead to an unequivocal conclusion. In the

288 cell line datasets, the fixed size AGSs performed significantly better, while in the TCGA datasets the situation  
289 was rather opposite.

290 Figure 3. Comparison of the potential performance of different features, methods, and data types.

291 The top 5 boxplot rows (labeled ".kegg") present results obtained using the limited set of 197 KEGG pathways using gene  
292 expression data (label "GE"). Next, since ORA, PWNEA, and GNEA did not require intra-pathway topology and could  
293 accept any data type, the rest of boxplots present tests on the full set of 328 FGS (the respective PWNEA and ORA values  
294 for GE might differ, since the KGML gene sets were somewhat different from the core KEGG version).

295 Each boxplot element combines correlation values between either features for a given class (labeled at the vertical axis)  
296 and for either the *in vitro* response to drugs in the three screens (left pane; in total 365 tests of 320 distinct drugs) or for the  
297 survival of patients who had been treated with drugs (right pane; 42 drugs in the eight TCGA cohorts). As an example, we  
298 calculated Spearman rank correlations between sensitivity of cell lines to drug RITA and transcriptomics features of these  
299 cell lines: either original Affymetrix (CCLE) gene expression profiles (18900 genes) or enrichment profiles of cell line  
300 specific AGSs of class `top.400.affymetirx_ccle` produced by GSEA (328 FGS features), pathway-level NEA  
301 (PWNEA; the same 328 features), and gene-level NEA (GNEA, in which 19027 nodes in the global network were treated  
302 as single-gene FGSs). The p-values of Spearman correlations between features and the drug sensitivity were then  
303 adjusted for multiple testing. The fractions of adjusted p-values below 0.1 became X-coordinates for the plot. The four  
304 examples (indicated by the blue markers), respectively, gave fractions  $1837/18900=0.097$ ;  $23/328=0.070$ ;  $78/328=0.236$ ;  
305 and  $2090/19027=0.110$ . Each boxplot element combined such fraction values for each drug from each screen or TCGA  
306 cohort as well as all alternative AGSs classes for ORA, PWNEA, and GNEA. The features are grouped by type of profiling  
307 (original data, ORA, PWNEA, and GNEA as grey, brown, dark green and bright green, respectively) and by data type (point  
308 mutations, PM; copy number alterations, CN; and gene expression, GE). The p-value is shown when a category produced  
309 significantly ( $p<0.001$  by Kolmogorov-Smirnov test) more non-zero patterns (i.e. fractions with  $FDR<0.1$ ) than the  
310 respective baseline category (labeled "BL"). The boxes contain data points within 25-75th percentile intervals (i.e. between  
311 quartiles Q1 and Q3). The maximal whisker length, MWL, is defined as 1.5 times the Q1-Q3 interquartile range (i.e. the box  
312 length). Whiskers can extend to either the MWL or the maximal available data point when the latter is below MWL. Markers  
313 thus correspond to data points that extend off the box by more than the MWL value.

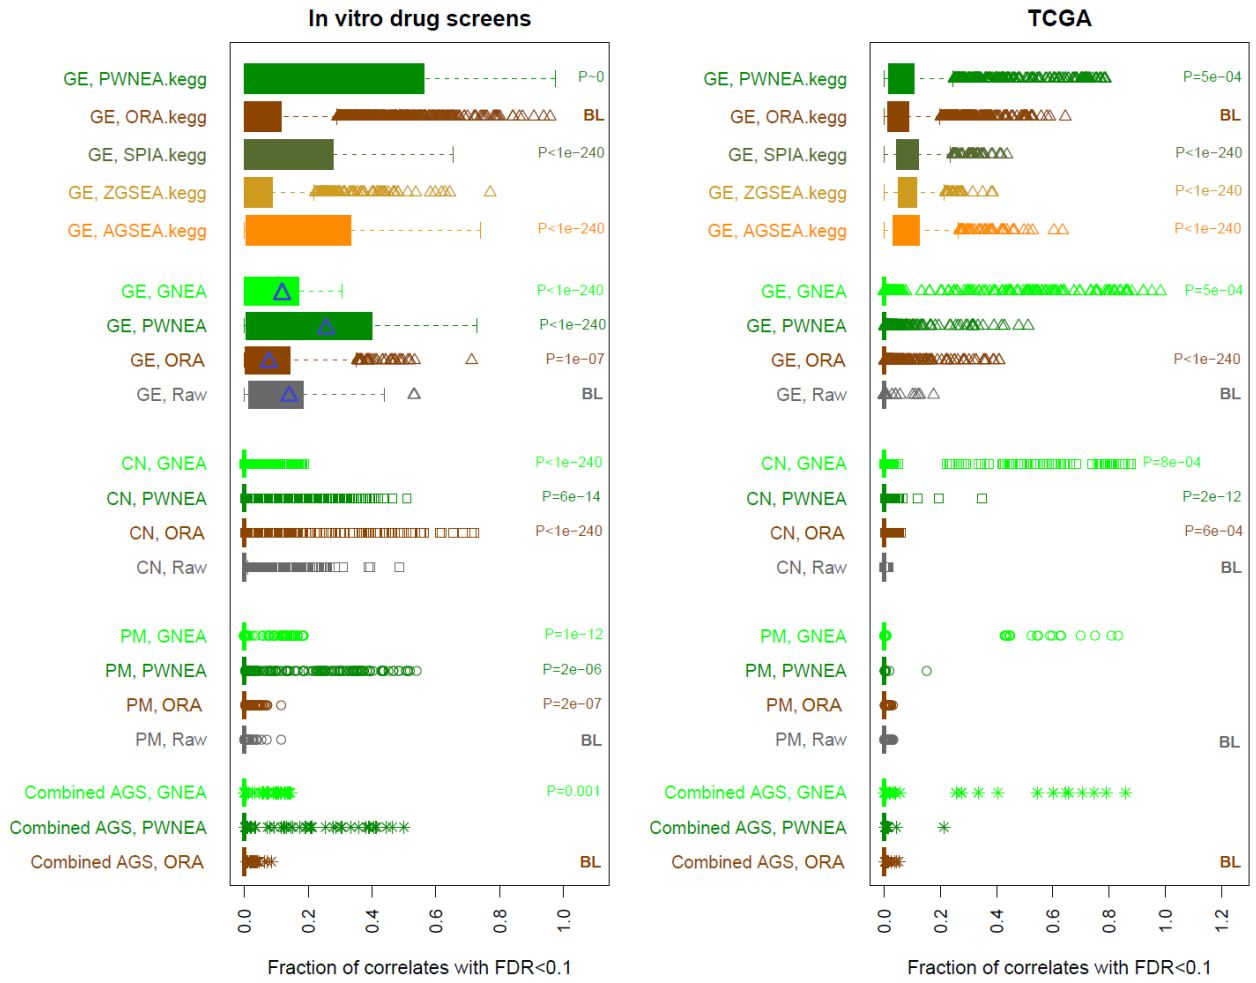

314

315

316 While the original features manifested considerable correlations in a number of classes, fractions of  
317 significant correlations were largely inferior when compared to NEA classes. In general, the different  
318 methods could be ranked by potential sensitivity in the following order: original gene profiles < [either ORA or  
319 ZGSEA] < [either AGSEA or SPIA] < [either PWNEA or GNEA]. However even upon adjustment for multiple  
320 testing, we did not draw ultimate conclusions from significance of these correlations. This exploratory  
321 analysis only informed us on the relative Type II error rates (i.e. sensitivity, or statistical power to detect  
322 correlation), suggesting that multiple alternative methods and data types were potentially predictive of drug  
323 sensitivity. In order to evaluate robustness of these predictions we proceeded to the validation step as  
324 described below. We also note that only ORA, PWNEA, and GNEA could provide means for integrating  
325 omics data from different platform (by simple merging of AGS lists), where ORA was apparently inferior.  
326



#### 327 **4. Consistency of the discovered correlates in different drug screens**

328 In order to test reproducibility of the drug-feature associations in alternative experimental settings, we used  
329 data from three *in vitro* drug screens: CCLE [12], CGP [13], and CTD [27]. A comparison between CCLE  
330 and CGP screens was earlier presented in [11]. The CTD drug screen was published later and provided  
331 additional shared compounds for our cross-screen analysis (31 in addition to the 16 available to Haibe-Kains  
332 and colleagues). Similarly to these authors, we found that the association values between drug sensitivity  
333 and original features only weakly agreed between the drug screens.

334 Albeit weak, these correlates were still significantly concordant across screens. Fig. 4A presents examples of  
335 between-screen rank correlations when using original gene expression profiles, ORA, PWNEA, and GNEA  
336 features. When comparing results from screens by CGP [13] and CTD [27], the correlation values  
337 between Affymetrix expression data and sensitivity to navitoclax ranged from  $R=0.31$  (original gene profiles)  
338 to  $R=0.81$  (GNEA). More systematic analyses demonstrated (Fig. 4, B and C) that using AGS features in  
339 PWNEA and GNEA considerably strengthened the concordance compared to the original gene profiles and  
340 AGSs in ORA. For example, by requiring across-screen rank correlations above 0.6, four NEA feature  
341 classes based on gene copy number performed better than any original copy number class. Under the same  
342 rank correlation threshold, eight out of ten transcriptomics NEA classes and all those based on point  
343 mutations were superior to the respective original data classes. Results obtained with ORA were, again,  
344 inferior to those from NEA and the summarized ranking appeared as: [original gene profiles and ORA] <  
345 PWNEA < GNEA. In the tests using 197 KGML-KEGG pathways and gene expression data, SPIA and  
346 AGSEA were somewhat superior over PWNEA.

347

348 Figure 4. Consistency of drug-feature associations between drug screens.

349 For each drug shared by any two of the three *in vitro* drug screens (in total 47 cases), we calculated rank correlation  
350 between drug-feature rank correlation coefficients in the two screens.

351 A. Agreement of drug-feature rank correlation coefficients between CGP and CTD screens of sensitivity to navitoclax  
352 using Affymetrix data as original gene expression values Affymetrix\_CCLE (left pane) and AGS features of class  
353 `significant.affymetrix_ccle` profiled with ORA, PWNEA, and GNEA (other panes). The agreement in this case  
354 was worst upon using ORA profiles (rank  $R=0.32$ ), whereas GNEA profiles performed best (rank  $R=0.81$ ). The red lines  
355 indicate the levels of false discovery rate (the correlation p-value adjusted by Benjamini-Hochberg)  $FDR=0.1$ . The grey  
356 diagonal line is the linear regression fit.

357 B. Fractions of cases with rank correlation value above each of the five specified thresholds on example AGS classes. The  
358 features are grouped by type of profiling and by data type identically to Fig. 3. Four example values from A are mapped to  
359 the gene expression plot in B. In order to characterize sensitivity to each of the 47 shared drugs, we used here, in parallel  
360 with respective original gene profiles, AGS features of one class of each type: `significant.filtered.exome.mini`  
361 (PM), `significant.filtered.snp6.mini` (CN), and `significant.affymetrix_ccle` (GE), and  
362 `significant.filtered.combined.maxi` ('combined'). The advantage of GNEA (with the exception of "Point  
363 mutations" and "Gene copy number") and PWNEA became apparent at the highest cutoffs  $R>0.60$  and  $R>0.75$ .

364 C. Similarly to B, fractions of values above each of the five specified thresholds were calculated for *all* classes and  
365 combined for all data types. For certain AGS classes, PWNEA and GNEA produced correlates highly conserved across  
366 screens ( $R>0.6$ ) in as many as 5-10% of cases.

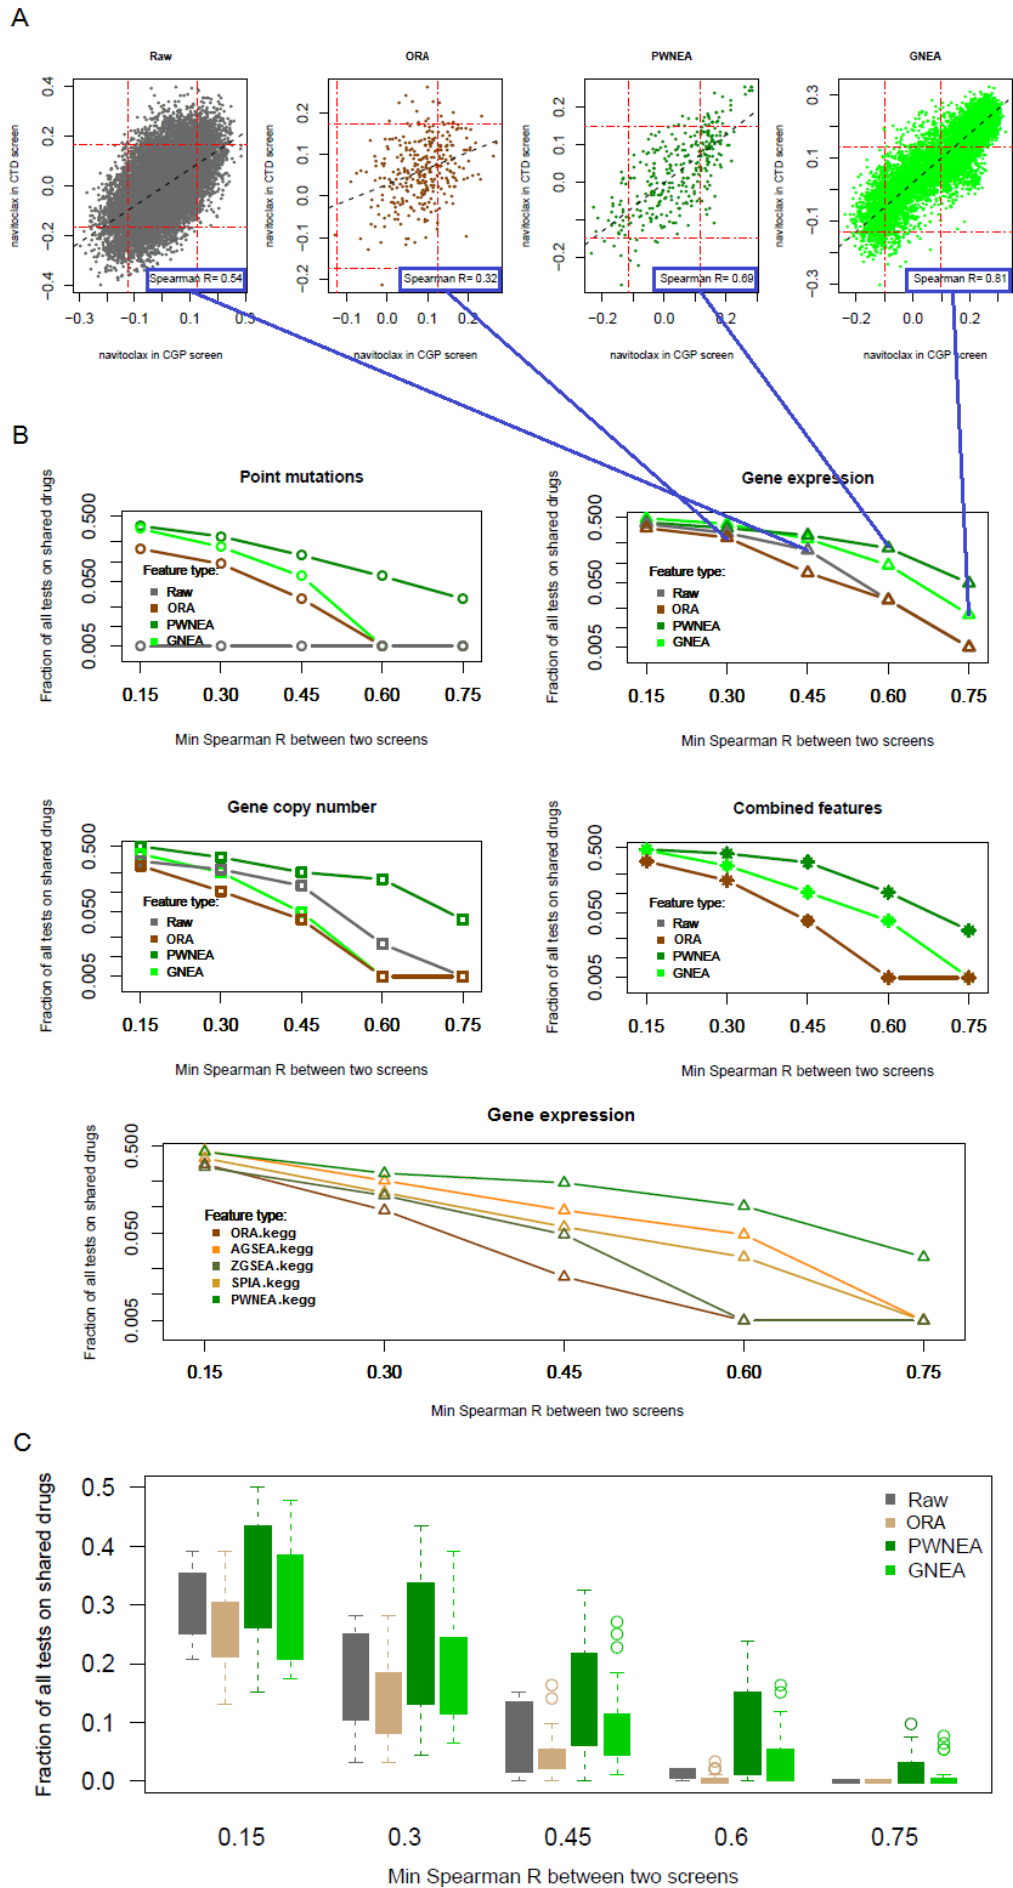

368

369 We validated drug sensitivity profiles of four anti-cancer compounds, tested previously in the CTD screen -  
370 RITA, PRIMA-1<sup>MET</sup>/Apr-246, nutlin and JQ1 - in a new *in vitro* screen, named ACT. The activities of these  
371 compounds were re-tested in a panel of 20 cancer cell lines (the ACT set) for which the CCLE gene  
372 expression and point mutation profiles data were available. The wide response ranges indicated sufficient  
373 differential response across the ACT set. Similarly to the results in Fig. 3, both original gene profiles and NEA  
374 features showed significant, moderately strong correlation with drug sensitivity, which demonstrated the  
375 potential of multivariate models for drug sensitivity prediction.

376 As shown above, the original gene profiles were poorly preserved across drug screens. Therefore, we  
377 compared the CTD results with those from ACT screen in a more relevant multivariate approach using the  
378 "elastic net" method [37]. Starting from all available features, each model was finally reduced to a much  
379 smaller subset. Multi-variate models are notoriously prone to over-fitting when the number of variables  
380 exceeds the number of samples. For this reason, validation on independent sets has become an essential  
381 requirement in such studies [38]. We thus created CTD-based models using cell lines not found in the ACT  
382 screen. The comparison was also streamlined by using only the data from CCLE Affymetrix and point  
383 mutation datasets versus two respective feature AGS classes `mutations.mgs` and  
384 `significant.affymetrix_ccle`. Using other classes produced similar results (data not shown).

385 Figure 5 demonstrates that by applying the same set of elastic net parameters, in every case it was possible  
386 to obtain a descriptive model from CTD drug screen data with a number (4...129) of non-zero terms and then  
387 substantiate the model (possibly with a poorer performance) using the ACT data in a smaller cell line set. For  
388 each modeled case, we compared observed and predicted drug sensitivity values. The most important  
389 observation was that in all instances without exception the signs of these correlations were consistent  
390 between CTD model and ACT validation, i.e. negative correlations in the training set remained negative upon  
391 validation.

392

393 Figure 5. Predicted versus observed drug sensitivity across cancer cell lines in discovery versus validation  
394 screens.

395 The predictive models for four compounds tested in the published CTD screen were validated in our ACT screen.  
396 Elastic net models were built under multiple cross-validation inside the training set (columns 1 and 3, blue) and then  
397 tested on non-overlapping sets of cell lines of the ACT screen (columns 2 and 4, green). Input variables were either  
398 original gene point mutation and expression profiles (columns 1 and 2, crosses) or PWNEA scores derived from these  
399 datasets for each cell line (columns 3 and 4, circles).

400 Legends in each plot display the values of Spearman rank correlation between observed and predicted values ('Rank  
401 r') and the number of non-zero terms in the model ('N'). Parameter  $\alpha$  for the shown plots was set to 0.9. Since  
402 the drug sensitivity values from CTD screen were inverted compared to the other screens, the correlations are  
403 presented as negative values (see also inverted vertical scales for "observed in Basu et al."). Detailed plots for  
404 models built under different  $\alpha$  parameters are found in Supplementary Files `glmnetModels.Basu_vs_new.raw.pdf`  
405 and `glmnetModels.Basu_vs_new.pwnea.pdf`.

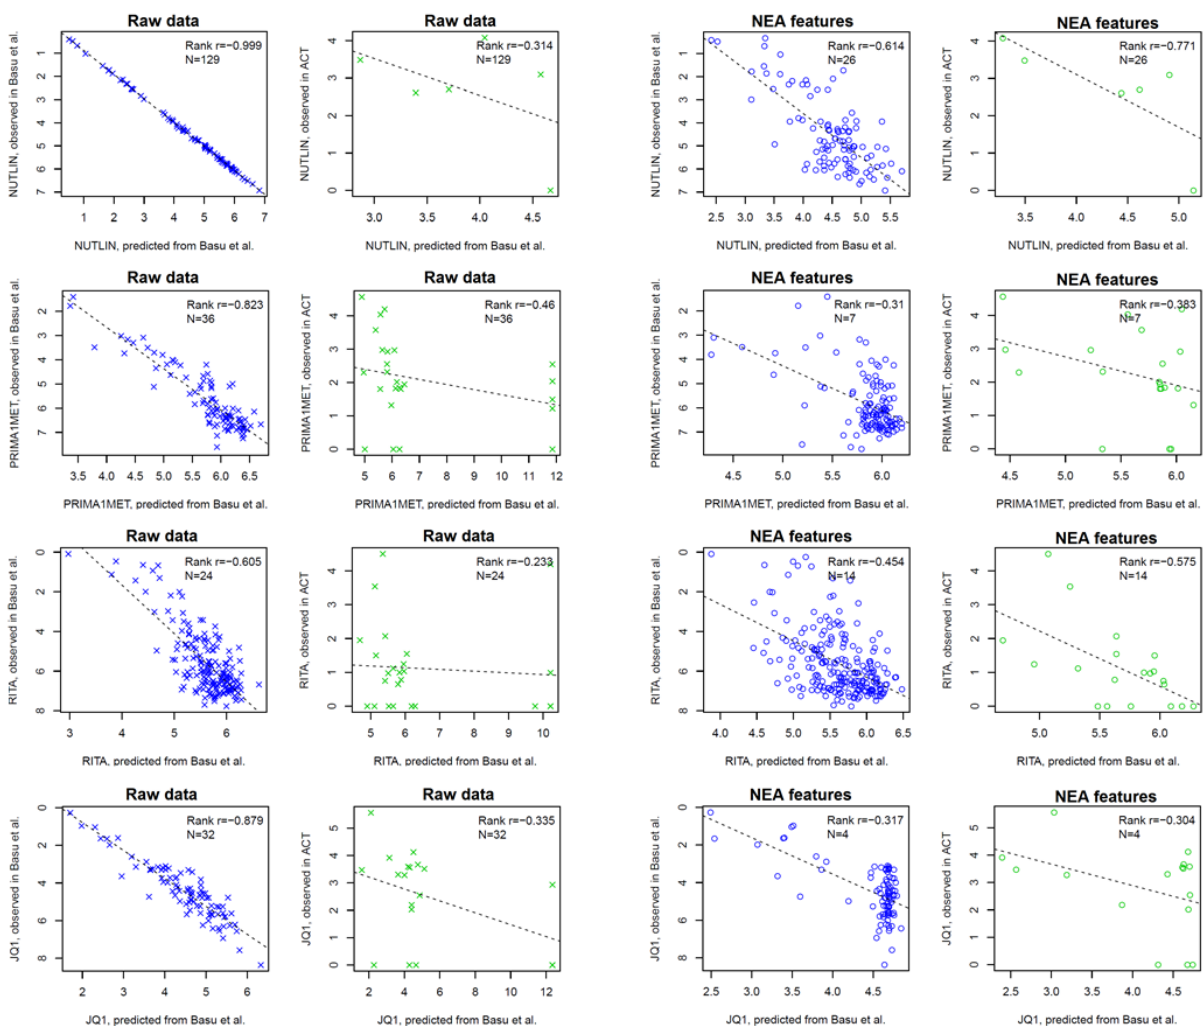

406

407

408 Overall, the performance of the original profile models on the validation sets appeared comparable to that of  
409 PWNEA. However importantly, the former had much more freedom in model term selection since the initial  
410 feature space was around two orders of magnitude larger than that in PWNEA. Consequently, despite the  
411 rigorous cross-validation and feature selection implemented in the `glmnet` algorithm, using the original  
412 profiles generated more complex models (see the number of terms per model, N) which fit the training sets  
413 better (and were clearly overfitting in the case of `nutlin`). At the validation step however, the performance of  
414 the models based on original data significantly worsened - whereas the performance of PWNEA-based  
415 models remained at roughly the same level (all results obtained under variable parameters can be found in  
416 Supplementary Files `glmnetModels.Basu_vs_new.raw.pdf` and `glmnetModels.Basu_vs_new.pwnea.pdf`). This  
417 result essentially corroborated the previous conclusion about lower robustness of the original gene profiles  
418 compared to NEA.

419

## 420 **5. Agreement between *in vitro* screens and clinical data**

421 A more challenging task was to identify a conservation of associated features between the *in vitro* drug  
422 screens and clinical application of the same drugs. Any trustworthy setup of such an analysis would be very  
423 complex, so that even cross-validation and adjustment for multiple testing could not guarantee unbiased  
424 probabilistic estimation. Thus, the final judgment should had been made after a biologically independent *ad*  
425 *hoc* validation from the *in vitro* to the clinical domain. Even though the TCGA collection did not provide  
426 correctly balanced, randomized cohorts for estimation of relative risks, error rates etc., our task was  
427 simplified by only needing to compare the methods' performance. In the eight largest TCGA cohorts, we  
428 counted how many significant *in vitro*-detected features correlated with survival of patients who received  
429 same drug [28], (<https://tcga-data.nci.nih.gov/docs/publications/tcga/>; Suppl. Table 4),  
430 [39]. More specifically, molecular features of each class that were significantly correlated with sensitivity to a  
431 drug in cell lines were required to be also significantly correlated with patient survival in a TCGA cohort. Our  
432 survival analysis accounted for clinical covariates available from TCGA (Suppl. Table 4), which enabled  
433 estimating the 'net' effects of molecular features.

434 We matched correlates of same data types in CCLE and TCGA (although possibly obtained using different  
435 omics platforms, e.g. Affymetrix microarray from CCLE could be matched to RNA-seq from TCGA etc.). Then  
436 we determined whether correlation p-values of individual features, in their turn, correlated between *in vitro*  
437 and TCGA data, i.e. if genes or FGSs with high (respectively low) correlation with drug response *in vitro*

438 tended to correlate in the same manner with the patients' response. Due to the testing of alternative AGS  
439 classes, respective numbers of matching pairs in ORA, PWNEA, or GNEA were an order of magnitude  
440 higher than in raw data (column 2 in Table 3). Therefore we coupled this calculation with a significance test  
441 by randomly permuting feature and sample labels. Altogether, the permutation tests indicated that point  
442 mutation and copy number data had zero true discovery rates (TDR), i.e. their correlation p-values were  
443 preserved not more than expected by chance (see column 3 in Table 3). On the contrary, the TDR levels  
444 were substantial (0.02...0.805) for gene expression data and for AGSs processed with each of the  
445 enrichment analyses.

446 At the next step (remaining columns of Table 3) we calculated the numbers of significant cases that would  
447 also be practically usable, i.e. had both lower p-values ( $<0.001$ ) and rank correlation values higher than 0.2.  
448 No such cases were identified in the gene expression data. ORA, PWNEA, and GNEA yielded 0.8%, 3.5%,  
449 and 5.9% of practically usable cases, respectively. Interestingly, most (56 out of 78) of the ORA cases were  
450 identified in the breast cancer cohort, whereas the preserved PWNEA and GNEA correlations distributed  
451 uniformly across all the TCGA cohorts, except prostate cancer which cohort shared only one drug with one *in*  
452 *vitro* screen. Remarkably, the separate test using the 197 KGML KEGG pathways also demonstrated  
453 superiority of PWNEA over ORA, ZGSEA, AGSEA, and SPIA - despite the reasonably good performance of  
454 the latter two in the *in vitro* analyses presented above. Thus at this crucial validation stage, robustness of the  
455 data types while translating drug sensitivity correlates between *in vitro* and clinical applications increased in  
456 the following order: [point mutations and gene copy number changes] < [gene expression] < [ORA, ZGSEA,  
457 AGSEA, and SPIA] < PWNEA < GNEA.

458

459 Table 3. Conservation of drug sensitivity correlates between the *in vitro* drug screens and clinical  
 460 applications.

| Feature type                         |                             | No. of available "feature X drug" tests | True discovery rate by permutation test, p(H0)<0.01 | No. of usable correlates, so that p(H0) < 0.001 and rank R > 0.2 |                         |                        |                            |                              |                           |                               |                       |                               |
|--------------------------------------|-----------------------------|-----------------------------------------|-----------------------------------------------------|------------------------------------------------------------------|-------------------------|------------------------|----------------------------|------------------------------|---------------------------|-------------------------------|-----------------------|-------------------------------|
|                                      |                             |                                         |                                                     | All TCGA cohorts (% of available correlates)                     | Bladder carcinoma, BLCA | Breast carcinoma, BRCA | Colon adenocarcinoma, COAD | Glioblastoma multiforme, GBM | Lung adenocarcinoma, LUAD | Lung squamous carcinoma, LUSC | Ovarian carcinoma, OV | Prostate adenocarcinoma, PRAD |
| Original gene profiles               | Point mutations, PM         | 360                                     | 0                                                   | 0                                                                | 0                       | 0                      | 0                          | 0                            | 0                         | 0                             | 0                     | 0                             |
|                                      | Copy number alterations, CN | 522                                     | 0                                                   | 0                                                                | 0                       | 0                      | 0                          | 0                            | 0                         | 0                             | 0                     | 0                             |
|                                      | Gene expression, GE         | 1080                                    | 0.149                                               | 0                                                                | 0                       | 0                      | 0                          | 0                            | 0                         | 0                             | 0                     | 0                             |
| Enrichment analysis                  | ORA                         | 9014                                    | 0.033                                               | 78 (0.8%)                                                        | 0                       | 56                     | 0                          | 3                            | 3                         | 8                             | 8                     | 0                             |
|                                      | PWNEA                       | 8822                                    | 0.146                                               | 305 (3.5%)                                                       | 18                      | 60                     | 20                         | 52                           | 51                        | 45                            | 59                    | 0                             |
|                                      | GNEA                        | 8630                                    | 0.805                                               | 505 (5.9%)                                                       | 15                      | 84                     | 46                         | 113                          | 93                        | 72                            | 82                    | 0                             |
| Enrichment analysis, GE on KEGG only | ORA                         | 5252                                    | 0.025                                               | 21 (0.3%)                                                        | 0                       | 5                      | 0                          | 2                            | 4                         | 2                             | 8                     | 0                             |
|                                      | ZGSEA                       | 1080                                    | 0.037                                               | 8 (0.7%)                                                         | 0                       | 2                      | 0                          | 0                            | 1                         | 0                             | 5                     | 0                             |
|                                      | AGSEA                       | 1080                                    | 0.020                                               | 7 (0.6%)                                                         | 0                       | 7                      | 0                          | 0                            | 0                         | 0                             | 0                     | 0                             |
|                                      | SPIA                        | 1080                                    | 0.048                                               | 3 (0.3%)                                                         | 0                       | 0                      | 0                          | 3                            | 0                         | 0                             | 0                     | 0                             |
|                                      | PWNEA                       | 4988                                    | 0.241                                               | 364 (7.2%)                                                       | 44                      | 83                     | 20                         | 79                           | 27                        | 19                            | 92                    | 0                             |

461  
 462

463



464 The purpose of this analysis was to prove systematically significance of the produced correlates, and we  
465 reiterate that using the original data did not seem efficient: although many transcriptomics profiles correlated  
466 with drug sensitivity, those patterns could not be traced back to the *in vitro* screens.

467 Most of the consistent NEA features were obtained for AGS based on gene expression data (Suppl. Table 2).  
468 They were identified for docetaxel, gemcitabine, and paclitaxel in BRCA (see the cancer cohort notation in  
469 Table 3); for dexamethasone, erlotinib, and topotecan in GBM; for gemcitabine in LUAD; and for  
470 gemcitabine, paclitaxel, tamoxifen, and topotecan in OV. While using gene copy number data, consistent  
471 PWNEA and GNEA features were found only for GBM (dexamethasone and topotecan). Consistent features  
472 that correlated with the response to cisplatin (LUSC) belonged to the combined, multi-platform types. Only  
473 one consistent GNEA feature was based on somatic mutation analysis (gemcitabine in LUSC), although it did  
474 not match all the criteria. Below we present promising features found in the drug screens, which were also  
475 predictive of survival if the drug was administered in a TCGA cohort.

476 The cancer emergence and progression were earlier linked to tissue inflammation through the NOD-like  
477 receptor signaling [40] . We found that the corresponding pathway score correlated with survival in ovarian  
478 carcinoma patients treated with topotecan (Fig. 6A).

479

480 Figure 6. Clinical performance of NEA features discovered in drug screens.

481 Each TCGA cohort was split into four categories by two factors: 1) administration of the specific drug and 2) predictive  
482 feature value (pathway or individual gene score, indicated in the plot header), each above and below a threshold. The  
483 primary feature evaluation employed p-values calculated in the continuous score space, i.e. without splitting the  
484 patient cohort into binary classes by factor (2). Then the binary classifications by the both factors were used for  
485 visualization (as “treated/untreated” for the drug and at the quantile “optimal threshold” value for the quantitative NEA  
486 feature). The p-values are shown for the both alternatives. The plots present differential survival upon treatment with  
487 topotecan in ovarian carcinoma (A and C), gemcitabine in lung adenocarcinoma (B), and vinorelbine in lung  
488 squamous cell carcinoma (D).

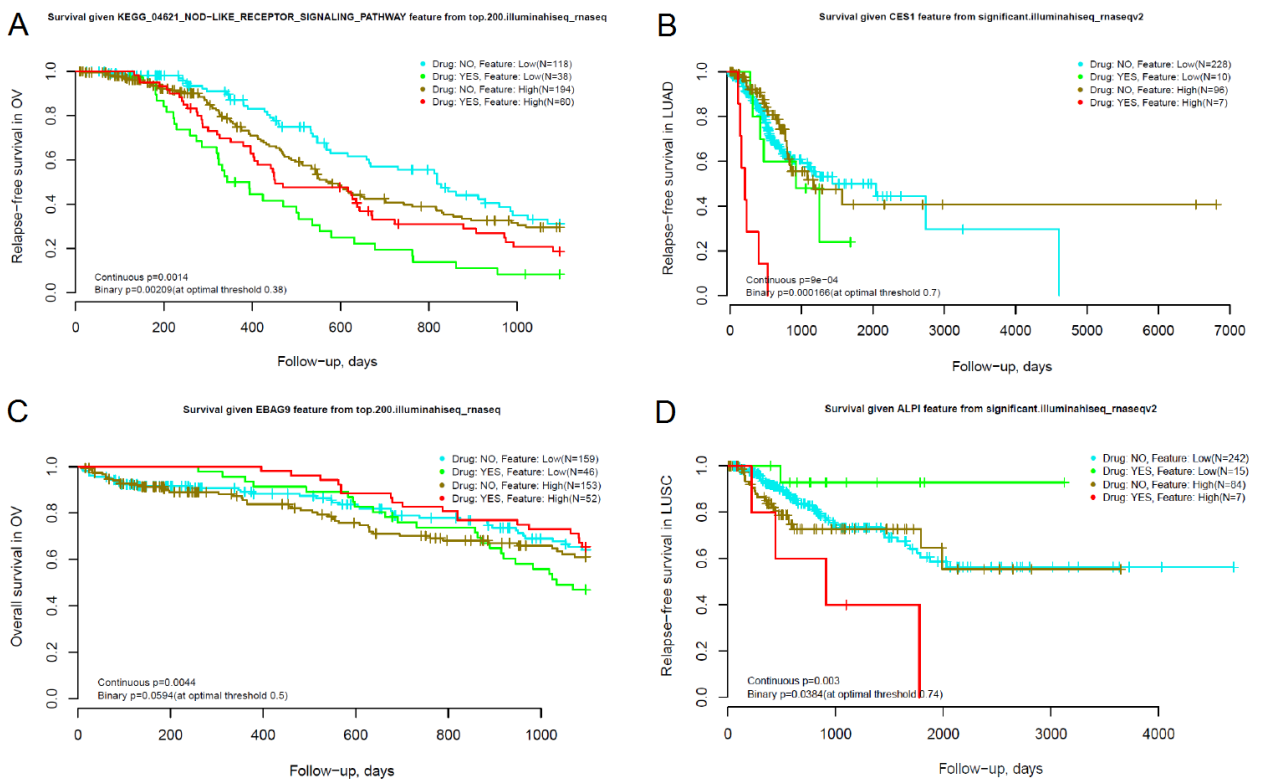

489

490

491

492 Carboxylesterases (CESs) are capable of hydrolyzing gemcitabine [41] - for instance, CES2 slows down  
493 hydrolysis of the gemcitabine pro-drug LY2334737 [42]. We identified as many as 31 gene-wise NEA  
494 features which correlated with relapse-free survival in lung adenocarcinomas treated with gemcitabine. This  
495 list of network nodes from GNEA included CES1 (Fig. 6B), CES2, CES7, and a number of cytochromes with  
496 possible involvement in the catabolism of xenobiotics. Many of these genes were AGS members in both the  
497 gemcitabine-sensitive cell lines and in patients who responded to the gemcitabine treatment and – at the  
498 same time - they themselves were members of KEGG pathways 00980 “Metabolism of xenobiotics by  
499 cytochrome p450”, 00983 “Drug metabolism – other enzymes”, and 00982 “Drug metabolism – cytochrome  
500 p450”. Consequently, the ORA and PWNEA analyses detected enrichment of these pathways in the same  
501 patients. However the pathway scores correlated with response to gemcitabine neither in the CCLE and CTD  
502 screens nor in the LUAD cohort) and therefore would be useless as biomarkers. The gene expression  
503 profiles of carboxylesterases and cytochromes in cell lines and primary tumors did not correlate with  
504 gemcitabine response either. EBAG9 had been implicated previously in ovarian cancer progression [43],  
505 but it has not been shown to affect response to topotecan. Indeed, in the datasets of our study the  
506 expression of the gene itself correlated neither with cell line sensitivity to topotecan nor with patient survival.  
507 However, the GNEA features for EBAG9 as a network node did correlate with sensitivity to topotecan *in vitro*  
508 (`top.200.affymetrix_ccle`;  $p(H_0)=4.2\times 10^{-11}$ ) and with overall survival of OV patients (Fig. 6C)  
509 (`top.200.illuminahisec_rnaseq`;  
510  $p(H_0)=4.4\times 10^{-4}$  during the 3-year follow-up time while accounting for “clinical stage” as a covariate).  
511 The intestinal-type alkaline phosphatase ALPI is known to be a modulator of cancer cell differentiation [44]  
512 and cytoprotection [45], [46]. In our analysis its GNEA feature was, in parallel with eleven others,  
513 negatively correlated with sensitivity to vinorelbine *in vitro* (`gnea.significant.affymetrix1`;  
514  $p(H_0)=1.1\times 10^{-07}$ ) and with overall survival of OV patients ( $p(H_0)=0.003$ ; Fig. 6D).  
515 This setup could not eliminate possible confounding effects from multi-drug treatment history and clinical  
516 factors that might determine administration of specific drugs. Nonetheless, the NEA scores apparently  
517 explained the differential sensitivity to anti-cancer drugs in a much more robust and efficient manner than the  
518 original data.  
519 A visual inspection of the survival curves in Fig. 6 sheds light on usefulness of these tentative biomarkers in  
520 a clinical setting. As an example, in a 1-year survival perspective, relative risks (RR) would either increase  
521 (Fig. 6A,C) or decrease (Fig. 6B,D) given higher NEA scores of the patient samples. By using this fixed  
522 follow-up interval and the cohorts of limited size, the confidence intervals at the 95% level would be rather

523 broad:  $\ln(\text{RR}) = 0.405$  (95% CI: [-0.07...0.88]);  $\ln(\text{RR}) = -2.061$  (95% CI: [-3.99...-0.13]);  $\ln(\text{RR}) = 2.211$   
524 (95% CI: [-0.70...5.12]);  $\ln(\text{RR}) = -2.181$  (95% [CI: -5.15...0.78]) for Fig. 6A...D, respectively. The fractions of  
525 patients who might benefit from using these predictors could be estimated in terms of absolute risk reduction  
526 as 0.17, 0.62, 0.08, and 0.25. Inversely, the “number needed to treat”, i.e. how many patients should be  
527 treated for one individual to benefit from the new test would have been 6.00, 1.60, 12.91, and 3.94,  
528 respectively [47]. However, additional responders could be detected by using other markers, used in  
529 parallel. As an example, beyond the “NOD-like receptor signaling pathway” at Fig. 6A, the response to  
530 topotecan in ovarian cancers similarly correlated with KEGG pathways “One carbon pool by folate” and  
531 “Bacterial invasion of epithelial cells” as well as with the GO term “Cytokine activity” (not shown). Predictions  
532 made with these markers would overlap only partially and therefore can complement each other. We  
533 presume that such discoveries should ultimately be evaluated by independent validation and careful clinical  
534 development. In fact, our combined analysis of independent cell screen and clinical results gave a first  
535 example of such validation.  
536

## 537 DISCUSSION

538 We have presented a way of using network enrichment scores for prediction of drug response and  
539 demonstrated its advantage compared to the conventional analyses of original gene profiles and alternative  
540 enrichment methods. In comparison to the latter, the NEA scores correlated stronger with drug sensitivity and  
541 were preserved better between independent screens. Multivariate models using NEA scores proved more  
542 compact and, at the same time, robust when re-tested on newly obtained data. Finally, corroborating *in vitro*  
543 phenotypes in corresponding clinical applications was possible by using the method NEAmarker but not by  
544 original profiles or alternative methods.

545 In our view, the advantages of our approach are due to the following features of network-based data  
546 interpretation: 1) combining major types of molecular interactions in a biologically relevant way, 2)  
547 summarizing seemingly disparate molecular alterations at the level of pathways and processes, and 3)  
548 enabling lower-dimensional statistical analysis. In addition, network views provide better grounds for  
549 biological interpretation and mechanistic studies. The types of evidence behind the edges (such as protein-  
550 protein interactions, mRNA co-expression, sub-cellular co-localization) might contribute to the integrated  
551 network differently. We refer to the previously published comparative analyses of the contributions [48],  
552 [34], [49]. The poor performance of the individual gene analysis and ORA could be explained by the  
553 excessive dimensionality of the former and poorer sensitivity of the latter (Fig. 1A). In addition, the ability to  
554 use smaller and hence more specific AGS could have provided extra advantage of NEA over ORA and  
555 GSEA. On the other hand, NEA could also deteriorate on AGS of insufficient size when using sparser  
556 networks (around  $10^4 \dots 10^5$  edges) and networks with many missing nodes. These potential limitations were  
557 established earlier [34] and we tried to avoid them in the present work by using e.g. the dense network  
558 from data integration. Also there could be no edges connecting an AGS to a specific FGS (even though such  
559 cases would still have certain variability of NEA scores due to variable values of  $\hat{n}_{\text{AGS-FGS}}$ . We admit that a  
560 future, more comprehensive version of NEA might adopt advantages of the alternative enrichment methods  
561 by employing full gene lists (as in GSEA) and intra-pathway topology (as in SPIA). Indeed, at two steps of  
562 our analysis these methods demonstrated performance comparable to that of NEA (Fig. 3 and 4).

563 A common problem of method benchmarking is the unavailability of ground truth. In our case, too, we did not  
564 possess a set of truly existing molecular correlates of drug sensitivity. Comparing alternatives by the total  
565 number (fraction) of positives would not enable a proper control of the false positive rate. In similar situations,  
566 when it was impossible to distinguish between true and false positives, authors often chose to present

567 biologically sensible examples, such as enrichment of a pathway pertinent to the problem [22], [50] or  
568 correlation with a known drug target [15]. In the present work, we evaluated concordance of phenotype  
569 correlations between different, independently collected datasets. This allowed us to circumvent the problem  
570 of false positives via a more compelling prove: the methods were compared by the fractions of corroborated  
571 findings, which would be extremely unlikely by chance.

572 We started with analysis of drug screens using samples from The Cancer Cell Line Encyclopedia [12]  
573 profiled for somatic point mutations, gene copy number changes, and gene transcription [35],[13],[12].  
574 Consequently, in TCGA cohorts we focused on the same data types. The individual molecular phenotypes  
575 were characterized with AGSs compiled using a number of alternative methods. The analysis provided a  
576 primary comparison of their relative performance but – at the current stage – did not enable definite  
577 conclusions about performance of the different AGS classes. Indeed, AGS of fixed size (`top.N`) versus  
578 variable size (`significant`) compared differently in the cell lines versus the TCGA data (Suppl. Table 1).  
579 Further in the analysis of consistency *in vitro* versus clinical results, these classes were almost equally  
580 represented (Suppl. Table 2). We have also seen differences between different filtering approaches in AGSs  
581 of classes `significant.mini` and `significant.maxi` (Suppl. Fig. 2). Therefore an issue to be  
582 investigated further is the comparative performance and robustness of different feature classes, platforms  
583 etc. Importantly, multiple platforms' data can be integrated into combined AGSs. Although in our analysis  
584 such AGSs did not perform much better than platform-specific ones (most likely due to the domination of  
585 transcriptomics data), a more detailed evaluation should be done, including new platforms from TCGA and  
586 elsewhere, such as DNA methylation, protein phosphorylation etc. Given the diversity of carcinogenesis  
587 routes and the multiplicity of respective molecular mechanisms, combining platforms appears essential and  
588 most promising. Incorporation of approaches from sparse linear regression modeling, SPIA, GSEA, and  
589 PARADIGM certainly represent promising ways in this direction.

590 The statistical power of NEA was obviously far from full. As an example, there were 13 drugs for which the  
591 numbers of tested cell lines and patients treated in TCGA cohorts were sufficient for a significant estimation.  
592 For four drugs out of these 13, no reliable correlates could be found. One instructive example could be  
593 irinotecan, prescribed to 25 and 22 patients in COAD and GBM cohorts, respectively. The interesting feature  
594 of irinotecan is that its pharmacokinetic pathway involves the same enzymes as that of gemcitabine (Fig.  
595 6B), namely CES1, CES2, CYP3A4, CYP3A5 and some others  
596 ([https://en.wikipedia.org/wiki/Irinotecan#Interactive\\_pathway\\_map](https://en.wikipedia.org/wiki/Irinotecan#Interactive_pathway_map)) – although the enzymes here work in an

597 opposite direction: they activate irinotecan rather than degrade as they do to gemcitabine. Nonetheless,  
598 relevant GNEA scores might have been informative for response to irinotecan. The patients' response was  
599 sufficiently differential, too: while all the irinotecan-treated patients relapsed, the time to relapse varied from  
600 78 to 1265 days. However, we did not observe almost any sensible correlation of the pathway genes neither  
601 as GNEA features nor as raw gene expression profiles. In the GNEA framework, this elucidated a lack of  
602 network linkage between the AGSs of responders (or non-responders) to the irinotecan pathway.

603 Further, our FGSs were created by third-party sources and never meant to be used in NEA. Thus, another  
604 step for NEA-based biomarker discovery would be the compilation of novel, specifically optimized FGSs.  
605 Ultimately, one could compile *de novo* pathways - similarly to the approach by [51] - but specifically  
606 informative of the drug response or disease prognosis. An example of such a functional set could be the  
607 presented above combination of the ten carboxylesterases and cytochromes.

608 Finally, given the low overlap of member genes between individual AGS, it is important to establish how  
609 AGS-level biomarker panels would practically summarize gene-level information and organize the  
610 accompanying statistical framework. Ways to compile and employ multi-platform AGSs, optimal FGS design,  
611 and construction of NEA-based biomarker panels should therefore become the topics of future studies.

612

## 613 MATERIALS AND METHODS

### 614 *Drug screens*

#### 615 Cell lines used in ACT screen

616 In this analysis, we used 20 cancer cell lines for which molecular data could be found in the CCLE Affymetrix  
617 set as well as in both CCLE and COSMIC point mutation sets: A375, HCT116, HDLM2, HT29, JVM2, K562,  
618 L428, MCF7, MDAMB231, MV411, NB4, PL21, RAJI, RKO, SJSA1, SKBR3, SKNAS, SW480, T47D, and  
619 U2OS. Eight of these cell lines had also been included in the CTD screen (A375, HCT116, HT29, MCF7,  
620 PL21, RKO, SW480, and U2OS). In order to avoid overlap in the multivariate models, we excluded these  
621 eight cell lines while training the original models from the CTD data and only used them in the validation set.

#### 622 Assay for cell proliferation used in ACT screen

623 Cell proliferation was estimated with the WST-1 assay (water soluble tetrazolium). Briefly, cells were  
624 incubated with each drug for 72 hours in a 96-well plate. At the end of this period, they were incubated with  
625 WST-1 reagent (Roche) for 2 hours. Absorbance at 450nm was measured following the instructions from the  
626 manufacturer. The cell proliferation rate compared to that in the control was calculated.

627 For adherent cultures, cells were attached overnight before adding the compounds. For hematological  
628 malignancies, the compounds were added simultaneously with seeding cells. The initial cell density was  
629 chosen so as to avoid confluence at the end of the assay. Each compound was applied in six consecutive 3-  
630 fold dilutions. In all cases except JQ1, the stock for each drug was established at the concentration based on  
631 efficacy determined individually for each drug. Final concentrations were for RITA: 0.01, 0.04, 0.12, 0.37,  
632 1.11, 3.33  $\mu\text{M}$ ; for Apr-246/PRIMA-1-met: 0.3, 1, 3, 9, 28, 83  $\mu\text{M}$ ; for Nutlin-3a: 0.14, 0.41, 1.23, 3.7, 11.11,  
633 33.33  $\mu\text{M}$ . For JQ1 the cell lines HDLM2, HT29, MCF7, RAJI, RKO, SJSA1, SKBR3, and SW480 were  
634 tested using the final concentration range 1.66...0.007  $\mu\text{M}$  in 1:3 serial dilutions. However later we found it  
635 necessary to raise the concentration by one order of magnitude, so that the final concentrations for the rest  
636 of the cell lines were 16.66, 5.55, 1.85, 0.61, 0.20  $\mu\text{M}$ . Then we respectively adjusted IC50 values for the first  
637 group as if they were tested under the final concentrations. This was done by incrementing the initial-stock  
638 IC50 values of HDLM2, HT29, RKO, and SW480 by  $\log_3(10) \approx 2.09$ . The cell lines MCF7, RAJI, SJSA1,  
639 SKBR3 did not show any sensitivity while using the initial stock (IC50 = 0), so that their IC50 values upon  
640 JQ1 treatment were declared missing.



641 IC50 was defined as the drug concentration inducing a 50% reduction in cell proliferation compared to the  
642 control. In the quantitative analysis, we used a universal scale for all the four drugs where units 1...6 stood  
643 for dilution steps (1=1:300; 2=1:900; 3=1:2700; 4=1:8100; 5=1:24300 and 6=1:72900). Sensitivity to  
644 compounds was expressed in IC50 values varying from 0 (insensitive to compound) to 6 (fully sensitive to  
645 compound).

646 IC50 values and p-values of the model parameters were calculated using function `drm` from R package `drc`  
647 [46]. The model form (argument `fct`) was chosen as LL.4, where model parameters `Lowest` and `Highest`  
648 were fixed at cell proliferation rates 0% and 100%, respectively, while parameters `slope` and `IC50` were left  
649 unfixed.

650 The IC50 values are provided as Supplementary File `IC50values.ACTscreen.xlsx`.

#### 651 **CCLC screen**

652 Barretina et al. [12] analyzed cell line sensitivity to 24 drugs in 504 cell lines. These authors considered a  
653 range of numeric sensitivity metrics for their analysis and finally preferred 'normalized activity areas'. These  
654 original units were calculated as areas under compound response curves where higher values corresponded  
655 to higher sensitivity so that 0 stood for 'insensitive to compound' and 8 corresponded to 'full sensitivity'.  
656 Further, the activity area values were normalized for unequal luminescence in the assay. We rendered them  
657 normally distributed by log-transformation. Thus the values in our analysis range from -3.00 meaning  
658 'insensitive to compound' to +2.31 meaning 'maximal sensitivity'.

#### 659 **CGP screen**

660 Garnett et al. (2012) [13] analyzed 138 drugs in 714 cell lines. They used a combination of IC50 and the  
661 slope parameter to achieve the most complete description of responses. We decided to use the AUC as a  
662 single feature that reflects the both values. AUC was originally provided in the same table and ranged from  
663 0% (fully sensitive) to 100% (insensitive). To approach the normal distribution, we transformed the values as  
664  $\log(1 - \text{AUC})$ , so that now they ranged from -8.11 meaning 'insensitive to compound' to 0 meaning 'maximal  
665 sensitivity'.

#### 666 **CTD screen**

667 The authors (Basu et al., 2013) [27] mainly used areas under curve (AUC) for their quantitative analysis of  
668 203 drugs in 242 cell lines. We reproduced this approach in our study. In completely insensitive cases, the  
669 full area under eight experimental points reached 8, whereas 0 stood for full sensitivity. Thus, the scale of  
670 this screen was inverted compared to the other screens, which was considered in all calculations.

## 671 *Molecular data*

### 672 **Gene expression**

673 The profiling was performed in CCLE study using Affymetrix GeneChip® Human Genome U133 Plus 2.0  
674 Array and in CGP study by Affymetrix GeneChip® HT Human Genome U133 Array plate. The expression  
675 datasets were normalized as described by the authors and made public. Expression profiles in the CTD  
676 study were from CCLE. It has been shown earlier [11] that disagreement between CGP and CCLE could be  
677 attributed to the usage of different transcriptomics datasets only to a minor extent. We checked both the  
678 CCLE and CGP expression profiles and concluded that the latter provided poorer statistical power in regard  
679 to drug sensitivity as well as lower coverage of both genes (13891 unique mapped gene symbols vs. 18900  
680 in CCLE) and cell lines (622 vs. 1034). For these reasons, we used the CCLE dataset in all the presented  
681 analyses. Expression values  $x$  of the downloaded datasets were transformed to  $\log_2(x)$ .

### 682 **Gene Copy Number**

683 CCLE, CGP, and CTD all employed Affymetrix SNP 6.0 microarrays for gene copy number detection. We  
684 downloaded the CCLE dataset [12] for 994 cell lines. In addition, we downloaded COSMIC data [35]  
685 independently produced by the same platform and then post-processed in three different ways to provide  
686 total, absolute copy number per gene, number of copies of the minor allele, and a binary classification of  
687 gene copy number values into "gain" vs. "loss". All datasets were used as downloaded, without further  
688 processing or normalization.

### 689 **Point mutations**

690 CCLE provided point mutation data on sequencing of 1667 genes in 904 cell lines. In addition, we  
691 downloaded COSMIC data from exome sequencing of 1023 cell line genomes, which mapped to 19759 gene  
692 symbols. Mutation data from the both screens were used in the binary form, i.e. all specifying attributes were  
693 neglected.

694 Following the same approach, we employed TCGA data on somatic point mutations reported in MAF files.  
695 The column 'Variant\_Classification' contained a number (more than 15) different codes, most frequent being  
696 Missense\_Mutation, Nonsense\_Mutation, and Silent. Since the latter constituted around 25% of the total  
697 number of somatic mutations reported in the eight cancers - which would not significantly affect the false  
698 positive and true discovery rates - we analyzed records with any such codes as potentially associated with  
699 drug response.

#### 700 *Alternative Methods of Pathway and/or Enrichment Analysis*

701 We evaluated a number of existing multivariate, enrichment-based, and/or network analysis methods that  
702 could be potentially useful in the proposed analysis, accounting for their complexity, applicability to different  
703 experimental designs, and the ability to analyze individual samples rather than the whole cohort. Various  
704 statistical algorithms have been proposed to quantify functional relevance of pathways and other gene sets  
705 by accounting for gene network topology.

706 A number of methods can generate sparse regression models via network-based regularization, i.e. account  
707 for topological relations between potential predictors (typically gene expression variables). The regularization  
708 is based on certain assumptions, such as that e.g. term coefficients of neighbor nodes should be zeroes or  
709 non-zeroes simultaneously [52], that edge confidence weights should influence penalties on the model  
710 coefficients [53], or that there exists equivalence (or at least parallelism) between connectivity of nodes and  
711 covariance of model terms [54], [55]. Advanced regularization of linear models in these methods often  
712 demonstrated promising efficiency [56]. However being very sophisticated, these models proved hard to  
713 tailor to novel, specific experimental designs. Notably, it was not feasible to include additional covariates or  
714 interaction terms which would be necessary for e.g. analyses similar to the one described in the present work  
715 - not even in the dedicated survival analysis method DegreeCox [57]. Using pathway membership  
716 information for summarizing cross-pathway linkage was proposed in [58] - however, adjusting its error rate  
717 model to other purposes has not been straightforward.

718 Technically, individual scores that estimate samples' uniqueness as compared to the rest of the collection  
719 can be obtained already from ORA, i.e. from the simplest analysis of dichotomous 2x2 tables applied to  
720 sample-specific gene sets [59], [60], [61], [62], also called "class I" in the classification by Huang et  
721 al. [29]. For comparison, the most popular gene set enrichment analysis, GSEA [24] has been usually  
722 applied to finding pathway enrichment in gene lists pre-ranked by cohort-wise statistics. As an example,

723 Haibe-Kains et al. [11] analyzed correlations between drug sensitivity and molecular features calculated on  
724 whole *in vitro* drug screens [12],[13] which are among the datasets re-analyzed in this article. Those pathway  
725 enrichment scores represented correlates of drug sensitivity over the whole screened collections rather than  
726 characterized individual cell lines. Likewise, Iuliano and co-authors [63] matched molecular landscapes to  
727 survival in cancer sample cohorts in order to reverse-engineer relevant pathway and network structures.  
728 Thus, global methods often employ powerful, heavily optimized statistical techniques and are used for  
729 sample exploration or differential expression analysis [27], [64] but cannot serve features for phenotype  
730 prediction in novel cell lines or tumors. An overview of network applications in cancer studies [65] showed  
731 that, indeed, most of the existing methods enabled exploratory analyses, discovery of driver genes and  
732 pathways as well as splitting a cohort into molecular subtypes, but did not characterize individual cases.

733 A number of hybrid approaches, such as SPIA [26] and iPAS [66] were also capable of calculating  
734 sample-specific pathway scores. However, their scores were based on gene expression values, which  
735 excluded the using of other data types. A genuinely integrative multi-omics method PARADIGM [67] (the  
736 program is currently distributed only via a company web portal), on the contrary, accounted for combinations  
737 of events in the chain DNA->mRNA->protein activity. As input, it required well characterized regulatory  
738 relationships – a complete set of which would rarely be available. Also, similarly to the former group of  
739 methods, it relied on comparing cancer to normal samples. Those dramatic alterations between the normal  
740 and cancer tissues encompassing thousands of genes would mask more fine-grained features that  
741 determine between-tumor heterogeneity, differences between sensitive and refractory cases etc. This  
742 requirement also precluded analyzing data where normal matches are missing, such as the widely used in  
743 our analysis cancer cell lines. Finally, EnrichNet [50] has been an algorithm closest in spirit to NEA: by  
744 using random walk with restart (hence not limited to 1-step network distances), it can trace AGS-FGS  
745 relationships via network paths. However it existed only in a single-AGS, web-based implementation and  
746 therefore was also not available for testing it the present analysis.

747 Even though individual enrichment scores can be correlated with phenotypes, they have still been rarely  
748 used in predictor models. In the case of ORA and GSEA, the major reason was that the enrichment is mostly  
749 detectable for large FGSs (hundreds to thousands genes), but such are unlikely to characterize functional  
750 differences between tumors - while compact, specific, and discriminatory gene sets tend to escape their  
751 limits of statistical power. Nonetheless, Drier et al. [68] have explored cancer cohorts with pathway-level  
752 sample scores derived from gene expression data in a quantitative way and found that certain sample

753 clusters can be associated with patient survival. On the other hand, the network-based methods have been  
754 developed only recently and are therefore ‘too young’ to have been exploited fully. Above, we have also  
755 mentioned the network-based regularization of multiple regression models where inclusion of gene terms into  
756 the models was essentially coupled to their co-expression.

757 We finally decided to include in our testing, in parallel with PWNEA (pathway level NEA) and GNEA (gene  
758 node level NEA), the following methods:

- 759 1) Using original gene profiles from respective omics platforms;
- 760 2) ORA, over-representation analysis which was capable of working on exactly the same AGS and FGS  
761 as PWNEA;
- 762 3) GSEA on full ranked gene lists, applying two alternative methods:
  - 763 a. AGSEA, ranking by absolute gene expression value,
  - 764 b. ZGSEA, ranking by deviation of gene expression from the cohort mean;
- 765 4) SPIA, measuring the pathway perturbation via known intra-pathway topology.

766 Using GSEA and SPIA was restricted to only transcriptomics data. SPIA, in addition, could only be run on  
767 pathways with known topology, which limited the set of available FGS to 197 KEGG pathways available in  
768 KGML format. This created an additional, specific line of testing on a limited collection of input data and  
769 FGSs for the methods ORA, AGSEA, ZGSEA, SPIA, and PWNEA (see Fig. 3,4 and Table 3).

## 770 *Network Enrichment Analysis (NEA, PWNEA, and GNEA)*

### 771 **Network**

772 The network was based on the FunCoup method [48] with consecutive merging of five more resources as  
773 described and benchmarked previously [34]. The results of that benchmark indicated that FunCoup was  
774 superior to STRING (a method similar to FunCoup in terms of scale and the size of input data collection,  
775 [69]), mostly due to the latter broadly using prokaryotic evidence and therefore less specific in cancer-related  
776 analyses. The second conclusion from the benchmark was that adding to the FunCoup network edges of  
777 curated databases significantly improved its performance. We therefore added the FunCoup-based network  
778 with functional links from KEGG [70], CORUM [71], and PhosphoSite [72], MSigDB transcription factor-  
779 related part, [73]), and an own reverse-engineered network [34]. The resulting network thus combined a  
780 wide range of molecular mechanisms, functional relations, and metrics from high-throughput data sets:  
781 physical protein-protein interactions, membership in same protein complex, membership in the same

782 pathway, correlation of mRNA profiles, correlation of protein abundance values, protein phosphorylation,  
783 coherence of GO annotations, concordance of upstream regulators (transcription factors and miRNAs), co-  
784 localization in same sub-cellular compartments, similarity of phylogenetic profiles etc. It contained 974,427  
785 edges (links) between 19027 nodes (distinct human gene symbols).

## 786 **Altered gene sets, AGS**

787 Point mutation data (mutation gene sets):

- 788 • `mutations.mgs`: point-mutated genes that proved to be significantly NEA-enriched to either KEGG  
789 pathway set #05200 "Pathways in cancer" or to the full set of point-mutated genes annotated in the  
790 given genome (the approach described by Merid et al. [34]).

791 Gene copy number and expression data:

- 792 • `top.200` and `top.400`: genes with copy number or mRNA expression value that in the given  
793 genome was among top 200 or top 400 most deviating from the gene's cohort mean using the one-  
794 sample Z-score. Each AGS thus had a fixed size, regardless of formal significance.
- 795 • `significant`: most deviating from the gene's cohort mean (same as above), but selected only if  
796 below the formal significance threshold (Benjamini-Hochberg [74] adjusted  $p$ -value $<0.05$ ). These  
797 AGSs had variable sizes, depending on the significance criterion.
- 798 • `significant.filtered.mini`: members of the respective `significant` set had, in addition,  
799 to be also significantly NEA-enriched to either KEGG set #05200 "Pathways in cancer" or to  
800 `mutations.mgs` set of the same sample (whichever NEA score passed the significance threshold  
801 NEA FDR=0.05).
- 802 • `significant.filtered.maxi`: members of the respective `significant` set were required to  
803 be significantly NEA-enriched to any of the signaling pathways (including all cancer ones) or to  
804 `mutations.mgs` set of the same sample.

805 Combined (multi-platform) AGS:

- 806 • `significant.filtered.combined.mini`: a merge of all sets of type  
807 `significant.filtered.mini`.
- 808 • `significant.filtered.combined.maxi`: a merge of all sets of type  
809 `significant.filtered.maxi`.

810 For convenience, AGS labels refer also to the platforms and sources, e.g. `top.200.cn_ccle`,  
811 `significant.filtered.maxi.affymetrix_ccle` etc.

## 812 FGS

813 The functional gene sets, FGSs, were AGS counterparts in the analysis. The main collection of 328 FGS was  
814 based on the KEGG pathways, the full collection of which was complemented with a number of separately  
815 published cancer pathways as well as specific GO terms corresponding to cancer-relevant signaling or  
816 hallmarks of cancer (around 70 cancer- and signaling-related gene sets from Reactome, Gene Ontology,  
817 WikiPathways and literature). Another approach was applied to enable compatibility with GSEA and SPIA.  
818 These methods were designed and are most suitable for analyzing expression data and, apart from that,  
819 SPIA was applicable only to pathways with well characterized intra-pathway topology. We therefore  
820 employed a special set of 197 KEGG pathways for which the topology was available in KGML files and  
821 tested on it SPIA, GSEA, ORA, and PWNEA exclusively gene expression data (these results were separately  
822 labeled as ORA.kegg, SPIA.kegg, AGSEA.kegg, ZGSEA.kegg, and PWNEA.kegg). The analysis on the FGS  
823 collection is referred to as pathway-level NEA (PWNEA).

824 In the other version of our analysis, called gene-wise NEA (GNEA), we treated each of the 19027 network  
825 nodes, regardless of their pathway or GO annotation, as a single-gene FGS.

826

## 827 Method

828 The major principles of NEA were described earlier [22]. In the current implementation, we evaluated  
829 enrichment of AGS versus FGS by the formula:

$$830 \chi^2 = \frac{(n_{AGS-FGS} - \hat{n}_{AGS-FGS})^2}{\hat{n}_{AGS-FGS}} + \frac{(!n_{AGS-FGS} - !\hat{n}_{AGS-FGS})^2}{! \hat{n}_{AGS-FGS}},$$

831 where  $!n$  means “complement to  $n$ ”, i.e. all global network edges that did not belong to  $N_{AGS-FGS}$ . The number  
832 of links expected under true null, i.e. by chance, was determined by:

$$\hat{n}_{AGS-FGS} = \frac{N_{AGS} * N_{FGS}}{2 * N_{total}}$$

833 Node connectivity values (numbers of all edges for each given node) were pre-calculated by the algorithm in  
834 advance, given the input network. Then  $N_{AGS}$  and  $N_{FGS}$  reported the sums of connectivities of member nodes

835 of AGS and FGS, respectively, and  $N_{total}$  was the number of edges in the whole network. Since it was  
836 desirable to provide normally distributed values for the downstream analyses (linear modeling, correlation,  
837 survival), we calculated p-values from the  $X^2$  statistic  $p(H_0)=f(X^2)$  using function `pchisq` available in R  
838 language and then re-calculated corresponding z-scores from the p-values as  $Z=F(p(H_0))$  with function  
839 `qnorm`. Since  $X^2$  is only defined on the non-negative domain, the z-scores were coerced negative in cases of  
840 depletion, i.e. when

$$841 \quad \hat{n}_{AGS-FGS} > n_{AGS-FGS} .$$

842 An important feature of GNEA (gene-wise NEA) is that its enrichment estimates are, on average, based on  
843 fewer network edges compared to PWNEA, so that often  $n_{AGS-FGS} = 0$ . In such cases, the enrichment score  
844 is negative and the difference  $n_{AGS-FGS} - \hat{n}_{AGS-FGS}$  reduces to  $-\hat{n}_{AGS-FGS}$ , which, in its turn, is a function of  
845 cumulative connectivity values  $N_{AGS}$  and  $N_{FGS}$ . In other words, lower NEA scores are then assigned to AGS-  
846 FGS pairs with more highly connected member nodes.

847 The steps of NEA described above can be performed with functions available in R package `NEArender`  
848 (<https://cran.r-project.org/web/packages/NEArender/>).

#### 849 *Signaling pathway impact analysis, SPIA*

850 The method by Tarca et al. [26] was implemented as an R package `SPIA`. The authors presented it as  
851 combination of two p-values:  $p_{NDE}$  from common analysis of overrepresentation of differentially expressed  
852 genes in KEGG pathways and  $p_{PERT}$  from a perturbation analysis by accounting for topological relations of  
853 the same genes within each KEGG pathway. Since the authors claimed that  $p_{NDE}$  values are no different  
854 from p-values from the trivial ORA, we used the pure  $p_{PERT}$  values from function `spia` (while the  
855 performance of ORA was evaluated separately). In order to get normally distributed values for our analyses,  
856  $p_{PERT}$  were transformed to Z-scores and signed according to the SPIA “Activated/inhibited” status as:

```
857 Z.spia=qnorm(pPERT/2, lower.tail=F)*ifelse(s1$Status=="Activated", 1, -1);
```

#### 858 *Gene Set Enrichment Analysis, GSEA*

859 The R implementation of GSEA was downloaded from

860 [http://software.broadinstitute.org/gsea/msigdb/download\\_file.jsp?filePath=/resources/software/GSEA-P-](http://software.broadinstitute.org/gsea/msigdb/download_file.jsp?filePath=/resources/software/GSEA-P-R.1.0.zip)  
861 [R.1.0.zip](http://software.broadinstitute.org/gsea/msigdb/download_file.jsp?filePath=/resources/software/GSEA-P-R.1.0.zip) (see also <https://software.broadinstitute.org/cancer/software/gsea/wiki/index.php/R->



862 [GSEA Readme](#)). While GSEA possesses a sophisticated toolbox for significance estimation via permutation  
863 tests, we needed only the enrichment score and therefore calculated only the core ES values via function  
864 `GSEA.EnrichmentScore`. Normally, GSEA has been used for analyzing gene rankings from multi-sample  
865 analyses with replicates, such as a *t*-test of an experimental versus control group. The single-sample GSEA  
866 (so called ssGSEA) needed for our analysis was described by Barbie et al. [25]. They produced sample-  
867 specific lists by ranking genes by absolute expression values in each given sample. We implemented this  
868 analysis under acronym AGSEA. However this approach might miss sample specificity. As an example, such  
869 ubiquitously expressed genes as GAPDH, RPS16, and RPS11 were found among the top 10 items in more  
870 than 90% of the CCLE cell line transcriptomes. For this reason, we additionally implemented and tested  
871 ranking genes in each sample by z-scores, i.e. by the standardized deviations from the genes' means across  
872 the whole cohort. Using this option, dubbed ZGSEA, was similar to mode `topnorm` for calculating AGS in  
873 function `samples2ags` of our package `NEArender`.

#### 874 *Overrepresentation analysis, ORA*

875 The overrepresentation analysis, ORA estimated the significance of overlap between AGS and FGS in 2x2  
876 tables. We did it via Fisher's exact test using the function `gsea.render` in the R package `NEArender`  
877 described above. In order to get ORA values normally distributed, the "estimate" values from function  
878 `fisher.test` were augmented with a pseudo-score 0.1 and log-transformed.

#### 879 *Correlation between drug sensitivity and molecular features*

880 In each of the four drug screens, we quantified correlation between the cell line sensitivity to each drug and  
881 each of the molecular features *F* according to a general model of the form:

$$S_d = \beta F + \varepsilon$$

882 where  $\varepsilon$  denotes residual, i.e. unexplained by feature *F*, variance. The features were either original gene  
883 profiles from the three platforms (point mutations screens, copy number arrays, and expression microarrays)  
884 or scores from GSEA, or scores from the two NEA modes, PWNEA and GNEA, i.e. pathway-level network  
885 enrichment scores and single-gene network enrichment scores, respectively. All data sets, except the point  
886 mutation set, contained continuous variables and were thus analyzed using Spearman rank correlation. The  
887 point mutation data were analyzed using a one-way ANOVA model with two levels of *F*: "any mutation"

888 versus "wild type". P-values of both Spearman and ANOVA were adjusted by Benjamini and Hochberg  
889 method[74].

### 890 *Elastic net models*

891 Every tested model was built under 10-fold cross-validation using function `cv.glmnet` of R package  
892 `glmnet` ([http://web.stanford.edu/~hastie/glmnet/glmnet\\_alpha.html](http://web.stanford.edu/~hastie/glmnet/glmnet_alpha.html)) with the following parameters:  
893 `lambda.min.ratio=0.01` (the default) and `nlambda=25` (default was 100). Parameter `alpha` varied as  
894 `{0.1; 0.3; 0.5; 0.9; 1.0}`. The reported cross-validated mean error and the number of variables in the model  
895 corresponded to `lambda.1se`, i.e. largest value of `lambda` found within 1 standard error of the minimum  
896 `lambda`. The regression of observed on predicted values was plotted using `lambda.min`.

### 897 *Drug sensitivity models in TCGA patients*

898 We used the follow-up time profiles for which both status records "relapse/relapse-free" and "dead/alive"  
899 were available, which allowed creating "relapse-free survival" and "overall survival" variables. Depending on  
900 the cancer aggressiveness and chemotherapy type, different timeframes could become informative in the  
901 analysis of the eight TCGA cohorts. The follow-up timeframes were defined as 1/5<sup>th</sup>, 1/2<sup>nd</sup>, and full available  
902 (up to 18 years) intervals.

903 For the analysis reported in "Statistical power to detect correlates of drug sensitivity", we used 42 drugs  
904 which were applied to at least 10 patients in one of the eight cohorts. In Figure 3 we report fractions of  
905 adjusted p-values (FDR) from this analysis calculated by Benjamini and Hochberg. For the analysis of  
906 "agreement between in vitro screen and clinical data" we only considered 14 of the compounds, which were  
907 found in the *in vitro* sets. The p-values from this analysis were Bonferroni-adjusted in the cross-comparisons  
908 between the *in vitro* and clinical results.

909 Matching significance of the drug-feature correlations that had been detected in the cell-line *in vitro* screens  
910 required accounting for multiple clinical variables. Such phenotype covariates as well as drug treatment data  
911 were obtained from TCGA as biotab files via

912 [https://tcga-data.nci.nih.gov/tcgafiles/ftp\\_auth/distro\\_ftpusers/anonymous/tumor/\\*/bcr/biotab/clin/](https://tcga-data.nci.nih.gov/tcgafiles/ftp_auth/distro_ftpusers/anonymous/tumor/*/bcr/biotab/clin/)

913 In order to measure and probabilistically estimate these effects, we fitted Cox proportional hazards  
914 regression models for every feature versus drug combination. Using all covariates available a cohort (such  
915 as "age at diagnosis", "year of diagnosis", "race", "gender", "ethnicity") could result in unrealistically complex

916 models. We thus included only covariates most likely associated with the disease prognosis, such as tumor  
917 degree, pathological tumor stage, immunohistochemical statuses in BRCA, Gleason score in PRAD,  
918 Karnofsky score in GBM (Suppl. Table 4). Next, we reasoned that when the association “feature - drug  
919 response” truly exists, we should observe it specifically in the patients who did receive the drug in the given  
920 TCGA cohort. Our survival models of the form

$$\log\left(\frac{\lambda(t|C_1 \dots C_k, D, F)}{\lambda_0(t)}\right) = \beta_1 C_1 + \dots + \beta_k C_k + \beta_d D + \beta_f F + \beta_i D * F + \varepsilon$$

921 contained, apart from the covariates  $C_1 \dots C_k$  and the residual term  $\varepsilon$ , main effects “drug”  $D$  and “feature”  $F$  as  
922 well as the interaction term  $D * F$ . A significant main effect of a drug could be interpreted as patients’ benefit in  
923 total and irrespective of the feature value, e.g. regardless of a gene mutation, or a gene expression, or a  
924 NEA-based pathway score. Conversely, a significant feature effect indicated that the feature correlated with  
925 survival directly, i.e. no matter if the drug was administered or not. Finally, significance of the interaction  
926 indicated efficacy of the drug specifically in patients with feature values either above or below a threshold, so  
927 that respective patterns could be explained by neither of the main effects. The interaction term was thus  
928 central for our purpose of detecting drug-feature correlations, whereas the significance of main effects of  
929 “feature” and “drug” was allowed although not required. As an example, a feature may or may not exhibit a  
930 significant correlation with survival in patients who did not receive the drug.

931 All survival analysis results were obtained using R package `survival` (<http://dx.doi.org/10.1007/978-1-4757-3294-8>). In order to estimate significance of the model terms, we used function `coxph` with  
932 continuous feature vectors. However, for visualizing the survival curves (Fig. 6) each feature was binarized at  
933 a cutoff that yielded the lowest p-value for the interaction term. Apart from the interaction model, we also  
934 checked if the p-value and FDR distributions preserved their properties under a unifactorial model. To this  
935 end, sub-cohorts of respective drug-treated patients were included in the survival analysis with the single  
936 main factor “feature”:  
937

$$\log\left(\frac{\lambda(t|C_1 \dots C_k, D, F)}{\lambda_0(t)}\right) = \beta_f F + \varepsilon$$

938

939 **ACKNOWLEDGEMENTS**

940 The authors are grateful for help from National Bioinformatics Infrastructure Sweden (NBIS), the members of  
941 ACT ('Advanced Cancer Therapies') consortium, and acknowledge financial support from Emil och Wera  
942 Kornells Stiftelse, Stockholm County Council, Swedish Cancer Society, Swedish Research Council, and  
943 Karolinska Institutet. We also recognize the contribution of specimen donors and research groups behind the  
944 samples of Cancer Cell Line Encyclopedia and The Cancer Genome Atlas.

945 **COMPETING INTERESTS**

946 The authors declare that they have no financial and non-financial competing interests.

947 **REFERENCES**

- 948 1. Bittner L. R. Bellman, Adaptive Control Processes. A Guided Tour. XVI + 255 S. Princeton, N. J., 1961.  
949 Princeton University Press. Preis geb. \$ 6.50. ZAMM - Z Für Angew Math Mech. 1962;42:364–5.
- 950 2. Heng HH. Debating Cancer: The Paradox in Cancer Research. World Scientific; 2015.
- 951 3. Lee W, Alexeyenko A, Pernemalm M, Guegan J, Dessen P, Lazar V, et al. Identifying and Assessing  
952 Interesting Subgroups in a Heterogeneous Population. *BioMed Res Int*. 2015;2015:462549.
- 953 4. Parker JS, Mullins M, Cheang MCU, Leung S, Voduc D, Vickery T, et al. Supervised Risk Predictor of Breast  
954 Cancer Based on Intrinsic Subtypes. *J Clin Oncol*. 2009;27:1160–7.
- 955 5. Wang Y, Klijn JGM, Zhang Y, Sieuwerts AM, Look MP, Yang F, et al. Gene-expression profiles to predict  
956 distant metastasis of lymph-node-negative primary breast cancer. *Lancet Lond Engl*. 2005;365:671–9.
- 957 6. Roepman P, Jassem J, Smit EF, Muley T, Niklinski J, van de Velde T, et al. An immune response enriched 72-  
958 gene prognostic profile for early-stage non-small-cell lung cancer. *Clin Cancer Res Off J Am Assoc Cancer  
959 Res*. 2009;15:284–90.
- 960 7. Subramanian J, Simon R. Gene expression-based prognostic signatures in lung cancer: ready for clinical  
961 use? *J Natl Cancer Inst*. 2010;102:464–74.
- 962 8. Waldron L, Haibe-Kains B, Culhane AC, Riester M, Ding J, Wang XV, et al. Comparative Meta-analysis of  
963 Prognostic Gene Signatures for Late-Stage Ovarian Cancer. *JNCI J Natl Cancer Inst*. 2014.  
964 doi:10.1093/jnci/dju049.
- 965 9. Iorio F, Knijnenburg TA, Vis DJ, Bignell GR, Menden MP, Schubert M, et al. A Landscape of  
966 Pharmacogenomic Interactions in Cancer. *Cell*. 2016;166:740–54.
- 967 10. Domcke S, Sinha R, Levine DA, Sander C, Schultz N. Evaluating cell lines as tumour models by  
968 comparison of genomic profiles. *Nat Commun*. 2013;4. doi:10.1038/ncomms3126.
- 969 11. Haibe-Kains B, El-Hachem N, Birkbak NJ, Jin AC, Beck AH, Aerts HJWL, et al. Inconsistency in large  
970 pharmacogenomic studies. *Nature*. 2013;504:389–93.
- 971 12. Barretina J, Caponigro G, Stransky N, Venkatesan K, Margolin AA, Kim S, et al. The Cancer Cell Line  
972 Encyclopedia enables predictive modelling of anticancer drug sensitivity. *Nature*. 2012;483:603–7.

- 973 13. Garnett MJ, Edelman EJ, Heidorn SJ, Greenman CD, Dastur A, Lau KW, et al. Systematic identification of  
974 genomic markers of drug sensitivity in cancer cells. *Nature*. 2012;483:570–5.
- 975 14. Stransky N, Ghandi M, Kryukov GV, Garraway LA, Lehár J, Liu M, et al. Pharmacogenomic agreement  
976 between two cancer cell line data sets. *Nature*. 2015. doi:10.1038/nature15736.
- 977 15. Crystal AS, Shaw AT, Sequist LV, Friboulet L, Niederst MJ, Lockerman EL, et al. Patient-derived models of  
978 acquired resistance can identify effective drug combinations for cancer. *Science*. 2014;346:1480–6.
- 979 16. Seashore-Ludlow B, Rees MG, Cheah JH, Cokol M, Price EV, Coletti ME, et al. Harnessing Connectivity in  
980 a Large-Scale Small-Molecule Sensitivity Dataset. *Cancer Discov*. 2015;5:1210–23.
- 981 17. Kurnit KC, Bailey AM, Zeng J, Johnson AM, Shufean MA, Brusco L, et al. “Personalized Cancer Therapy”: A  
982 Publicly Available Precision Oncology Resource. *Cancer Res*. 2017;77:e123–6.
- 983 18. Margolin AA, Bilal E, Huang E, Norman TC, Ottestad L, Mecham BH, et al. Systematic analysis of  
984 challenge-driven improvements in molecular prognostic models for breast cancer. *Sci Transl Med*.  
985 2013;5:181re1.
- 986 19. Cheng W-Y, Yang T-HO, Anastassiou D. Biomolecular Events in Cancer Revealed by Attractor Metagenes.  
987 *PLoS Comput Biol*. 2013;9:e1002920.
- 988 20. Costello JC, Heiser LM, Georgii E, Gönen M, Menden MP, Wang NJ, et al. A community effort to assess  
989 and improve drug sensitivity prediction algorithms. *Nat Biotechnol*. 2014;32:1202–12.
- 990 21. Maslov S, Sneppen K. Specificity and stability in topology of protein networks. *Science*. 2002;296:910–3.
- 991 22. Alexeyenko A, Lee W, Pernemalm M, Guegan J, Dessen P, Lazar V, et al. Network enrichment analysis:  
992 extension of gene-set enrichment analysis to gene networks. *BMC Bioinformatics*. 2012;13:226.
- 993 23. Jeggari A, Alexeyenko A. NEArender: an R package for functional interpretation of ‘omics’ data via  
994 network enrichment analysis. *BMC Bioinformatics*. 2017;18. doi:10.1186/s12859-017-1534-y.
- 995 24. Subramanian A, Tamayo P, Mootha VK, Mukherjee S, Ebert BL, Gillette MA, et al. Gene set enrichment  
996 analysis: A knowledge-based approach for interpreting genome-wide expression profiles. *Proc Natl Acad Sci*.  
997 2005;102:15545–50.
- 998 25. Barbie DA, Tamayo P, Boehm JS, Kim SY, Moody SE, Dunn IF, et al. Systematic RNA interference reveals  
999 that oncogenic KRAS-driven cancers require TBK1. *Nature*. 2009;462:108–12.
- 1000 26. Tarca AL, Draghici S, Khatri P, Hassan SS, Mittal P, Kim J -s., et al. A novel signaling pathway impact  
1001 analysis. *Bioinformatics*. 2009;25:75–82.
- 1002 27. Basu A, Bodycombe NE, Cheah JH, Price EV, Liu K, Schaefer GI, et al. An interactive resource to identify  
1003 cancer genetic and lineage dependencies targeted by small molecules. *Cell*. 2013;154:1151–61.
- 1004 28. Cancer Genome Atlas Research Network. Comprehensive genomic characterization defines human  
1005 glioblastoma genes and core pathways. *Nature*. 2008;455:1061–8.
- 1006 29. Huang DW, Sherman BT, Lempicki RA. Bioinformatics enrichment tools: paths toward the comprehensive  
1007 functional analysis of large gene lists. *Nucleic Acids Res*. 2009;37:1–13.
- 1008 30. Tabor H, Wyngarden L. The enzymatic formation of formiminotetrahydrofolic acid, 5,10-  
1009 methenyltetrahydrofolic acid, and 10-formyltetrahydrofolic acid in the metabolism of formiminoglutamic  
1010 acid. *J Biol Chem*. 1959;234:1830–46.

- 1011 31. Rajagopalan PTR, Zhang Z, McCourt L, Dwyer M, Benkovic SJ, Hammes GG. Interaction of dihydrofolate  
1012 reductase with methotrexate: Ensemble and single-molecule kinetics. *Proc Natl Acad Sci U S A*.  
1013 2002;99:13481–6.
- 1014 32. Snijders AM, Hermsen MA, Baughman J, Buffart TE, Huey B, Gajduskova P, et al. Acquired genomic  
1015 aberrations associated with methotrexate resistance vary with background genomic instability. *Genes*  
1016 *Chromosomes Cancer*. 2008;47:71–83.
- 1017 33. Pogribny IP, Dreval K, Kindrat I, Melnyk S, Jimenez L, de Conti A, et al. Epigenetically mediated inhibition  
1018 of S-adenosylhomocysteine hydrolase and the associated dysregulation of 1-carbon metabolism in  
1019 nonalcoholic steatohepatitis and hepatocellular carcinoma. *FASEB J Off Publ Fed Am Soc Exp Biol*. 2017.
- 1020 34. Merid SK, Goranskaya D, Alexeyenko A. Distinguishing between driver and passenger mutations in  
1021 individual cancer genomes by network enrichment analysis. *BMC Bioinformatics*. 2014;15:308.
- 1022 35. Forbes SA, Beare D, Gunasekaran P, Leung K, Bindal N, Boutselakis H, et al. COSMIC: exploring the  
1023 world’s knowledge of somatic mutations in human cancer. *Nucleic Acids Res*. 2014.  
1024 doi:10.1093/nar/gku1075.
- 1025 36. Storey JD, Tibshirani R. Statistical significance for genomewide studies. *Proc Natl Acad Sci U S A*.  
1026 2003;100:9440–5.
- 1027 37. Friedman J, Hastie T, Tibshirani R. Regularization Paths for Generalized Linear Models via Coordinate  
1028 Descent. *J Stat Softw*. 2010;33. doi:10.18637/jss.v033.i01.
- 1029 38. Committee on the Review of Omics-Based Tests for Predicting Patient Outcomes in Clinical Trials, Board  
1030 on Health Care Services, Board on Health Sciences Policy, Institute of Medicine. *Evolution of Translational*  
1031 *Omics: Lessons Learned and the Path Forward*. Washington (DC): National Academies Press (US); 2012.  
1032 <http://www.ncbi.nlm.nih.gov/books/NBK202168/>. Accessed 29 Nov 2015.
- 1033 39. Liu J, Lichtenberg T, Hoadley KA, Poisson LM, Lazar AJ, Cherniack AD, et al. An Integrated TCGA Pan-  
1034 Cancer Clinical Data Resource to Drive High-Quality Survival Outcome Analytics. *Cell*. 2018;173:400-  
1035 416.e11.
- 1036 40. Saxena M, Yeretssian G. NOD-Like Receptors: Master Regulators of Inflammation and Cancer. *Front*  
1037 *Immunol*. 2014;5:327.
- 1038 41. Williams ET, Bacon JA, Bender DM, Lowinger JJ, Guo W-K, Ehsani ME, et al. Characterization of the  
1039 Expression and Activity of Carboxylesterases 1 and 2 from the Beagle Dog, Cynomolgus Monkey, and  
1040 Human. *Drug Metab Dispos*. 2011;39:2305–13.
- 1041 42. Pratt SE, Durland-Busbice S, Shepard RL, Heinz-Taheny K, Iversen PW, Dantzig AH. Human  
1042 Carboxylesterase-2 Hydrolyzes the Prodrug of Gemcitabine (LY2334737) and Confers Prodrug Sensitivity to  
1043 Cancer Cells. *Clin Cancer Res*. 2013;19:1159–68.
- 1044 43. Akahira J-I, Aoki M, Suzuki T, Moriya T, Niikura H, Ito K, et al. Expression of EBAG9/RCAS1 is associated  
1045 with advanced disease in human epithelial ovarian cancer. *Br J Cancer*. 2004;90:2197–202.
- 1046 44. Shin J, Carr A, Corner GA, Togel L, Davaos-Salas M, Tran H, et al. The Intestinal Epithelial Cell  
1047 Differentiation Marker Intestinal Alkaline Phosphatase (ALPi) Is Selectively Induced by Histone Deacetylase  
1048 Inhibitors (HDACi) in Colon Cancer Cells in a Kruppel-like Factor 5 (KLF5)-dependent Manner. *J Biol Chem*.  
1049 2014;289:25306–16.

- 1050 45. Giatromanolaki A, Sivridis E, Maltezos E, Koukourakis MI. Down-regulation of intestinal-type alkaline  
1051 phosphatase in the tumor vasculature and stroma provides a strong basis for explaining amifostine  
1052 selectivity. *Semin Oncol.* 2002;29 6 Suppl 19:14–21.
- 1053 46. Ritz C, Baty F, Streibig JC, Gerhard D. Dose-Response Analysis Using R. *PLOS ONE.* 2015;10:e0146021.
- 1054 47. Laupacis A, Sackett DL, Roberts RS. An Assessment of Clinically Useful Measures of the Consequences of  
1055 Treatment. *N Engl J Med.* 1988;318:1728–33.
- 1056 48. Alexeyenko A, Sonnhammer ELL. Global networks of functional coupling in eukaryotes from  
1057 comprehensive data integration. *Genome Res.* 2009;19:1107–16.
- 1058 49. Alexeyenko A, Schmitt T, Tjarnberg A, Guala D, Frings O, Sonnhammer ELL. Comparative interactomics  
1059 with Funcoup 2.0. *Nucleic Acids Res.* 2012;40:D821–8.
- 1060 50. Glaab E, Baudot A, Krasnogor N, Schneider R, Valencia A. EnrichNet: network-based gene set  
1061 enrichment analysis. *Bioinforma Oxf Engl.* 2012;28:i451–7.
- 1062 51. Alcaraz N, List M, Batra R, Vandin F, Ditzel HJ, Baumbach J. De novo pathway-based biomarker  
1063 identification. *Nucleic Acids Res.* 2017. doi:10.1093/nar/gkx642.
- 1064 52. Kim S, Pan W, Shen X. Network-based penalized regression with application to genomic data. *Biometrics.*  
1065 2013;69:582–93.
- 1066 53. Li C, Li H. Network-constrained regularization and variable selection for analysis of genomic data.  
1067 *Bioinformatics.* 2008;24:1175–82.
- 1068 54. Zhao S, Shojaie A. A Significance Test for Graph-Constrained Estimation. *Biometrics.* 2016;72:484–93.
- 1069 55. Dirmeier S, Fuchs C, Mueller NS, Theis FJ. netReg: network-regularized linear models for biological  
1070 association studies. *Bioinformatics.* 2017. doi:10.1093/bioinformatics/btx677.
- 1071 56. Shojaie A, Michailidis G. Network enrichment analysis in complex experiments. *Stat Appl Genet Mol  
1072 Biol.* 2010;9:Article22.
- 1073 57. Veríssimo A, Oliveira AL, Sagot M-F, Vinga S. DegreeCox – a network-based regularization method for  
1074 survival analysis. *BMC Bioinformatics.* 2016;17:109–21.
- 1075 58. Huttenhower C, Haley EM, Hibbs MA, Dumeaux V, Barrett DR, Collier HA, et al. Exploring the human  
1076 genome with functional maps. *Genome Res.* 2009;19:1093–106.
- 1077 59. Tavazoie S, Hughes JD, Campbell MJ, Cho RJ, Church GM. Systematic determination of genetic network  
1078 architecture. *Nat Genet.* 1999;22:281–5.
- 1079 60. Drăghici S, Khatri P, Martins RP, Ostermeier GC, Krawetz SA. Global functional profiling of gene  
1080 expression. *Genomics.* 2003;81:98–104.
- 1081 61. Khatri P, Draghici S, Ostermeier GC, Krawetz SA. Profiling Gene Expression Using Onto-Express.  
1082 *Genomics.* 2002;79:266–70.
- 1083 62. Robinson MD, Grigull J, Mohammad N, Hughes TR. FunSpec: a web-based cluster interpreter for yeast.  
1084 *BMC Bioinformatics.* 2002;3:35.
- 1085 63. Iuliano A, Occhipinti A, Angelini C, De Feis I, Lió P. Applications of Network-based Survival Analysis  
1086 Methods for Pathways Detection in Cancer. In: di Serio C, Lió P, Nonis A, Tagliaferri R, editors. *Computational*

- 1087 Intelligence Methods for Bioinformatics and Biostatistics. Cham: Springer International Publishing; 2015. p.  
1088 76–88. [http://link.springer.com/10.1007/978-3-319-24462-4\\_7](http://link.springer.com/10.1007/978-3-319-24462-4_7). Accessed 10 Oct 2015.
- 1089 64. Yu X, Zeng T, Li G. Integrative enrichment analysis: a new computational method to detect dysregulated  
1090 pathways in heterogeneous samples. *BMC Genomics*. 2015;16. doi:10.1186/s12864-015-2188-7.
- 1091 65. Kim Y-A, Cho D-Y, Przytycka TM. Understanding Genotype-Phenotype Effects in Cancer via Network  
1092 Approaches. *PLOS Comput Biol*. 2016;12:e1004747.
- 1093 66. Ahn T, Lee E, Huh N, Park T. Personalized identification of altered pathways in cancer using accumulated  
1094 normal tissue data. *Bioinforma Oxf Engl*. 2014;30:i422-429.
- 1095 67. Vaske CJ, Benz SC, Sanborn JZ, Earl D, Szeto C, Zhu J, et al. Inference of patient-specific pathway activities  
1096 from multi-dimensional cancer genomics data using PARADIGM. *Bioinformatics*. 2010;26:i237–45.
- 1097 68. Drier Y, Sheffer M, Domany E. Pathway-based personalized analysis of cancer. *Proc Natl Acad Sci*.  
1098 2013;110:6388–93.
- 1099 69. von Mering C, Jensen LJ, Kuhn M, Chaffron S, Doerks T, Krüger B, et al. STRING 7--recent developments  
1100 in the integration and prediction of protein interactions. *Nucleic Acids Res*. 2007;35 Database issue:D358-  
1101 362.
- 1102 70. Kanehisa M, Goto S, Kawashima S, Nakaya A. The KEGG databases at GenomeNet. *Nucleic Acids Res*.  
1103 2002;30:42–6.
- 1104 71. Ruepp A, Brauner B, Dunger-Kaltenbach I, Frishman G, Montrone C, Stransky M, et al. CORUM: the  
1105 comprehensive resource of mammalian protein complexes. *Nucleic Acids Res*. 2007;36 Database:D646–50.
- 1106 72. Hornbeck PV, Kornhauser JM, Tkachev S, Zhang B, Skrzypek E, Murray B, et al. PhosphoSitePlus: a  
1107 comprehensive resource for investigating the structure and function of experimentally determined post-  
1108 translational modifications in man and mouse. *Nucleic Acids Res*. 2012;40:D261–70.
- 1109 73. Liberzon A, Birger C, Thorvaldsdóttir H, Ghandi M, Mesirov JP, Tamayo P. The Molecular Signatures  
1110 Database (MSigDB) hallmark gene set collection. *Cell Syst*. 2015;1:417–25.
- 1111 74. Benjamini Y, Hochberg Y. Controlling the False Discovery Rate: A Practical and Powerful Approach to  
1112 Multiple Testing. *J R Stat Soc Ser B Methodol*. 1995;57:289–300.
- 1113
- 1114



1115 SUPPLEMENTARY FILES

| File                               | Description                                                                                                                                                                                                                                                                                                                                                                                                                                                                                                                                                                                                                                                                                                                                                                                                                                                                                                                                                                                                                                                                                                                                                                                                                                                                                                                                                                                           |
|------------------------------------|-------------------------------------------------------------------------------------------------------------------------------------------------------------------------------------------------------------------------------------------------------------------------------------------------------------------------------------------------------------------------------------------------------------------------------------------------------------------------------------------------------------------------------------------------------------------------------------------------------------------------------------------------------------------------------------------------------------------------------------------------------------------------------------------------------------------------------------------------------------------------------------------------------------------------------------------------------------------------------------------------------------------------------------------------------------------------------------------------------------------------------------------------------------------------------------------------------------------------------------------------------------------------------------------------------------------------------------------------------------------------------------------------------|
| SupplementaryTablesAndFigures.docx | Supplementary tables and figures                                                                                                                                                                                                                                                                                                                                                                                                                                                                                                                                                                                                                                                                                                                                                                                                                                                                                                                                                                                                                                                                                                                                                                                                                                                                                                                                                                      |
| IC50values.ACTscreen.xlsx          | IC50 values of drug sensitivity over the cancer cell lines in the ACT drug screen (see Methods).                                                                                                                                                                                                                                                                                                                                                                                                                                                                                                                                                                                                                                                                                                                                                                                                                                                                                                                                                                                                                                                                                                                                                                                                                                                                                                      |
| glmnetModels.Basu_vs_new.raw.pdf   | <p>Building and validation of multivariate models of drug resistance from original point mutation and gene expression data.</p> <p>As explained in Methods, the multivariate models were obtained using the elastic net algorithm under variable 'alpha' parameters (see values A=0.1; A=0.3; A=0.5; A=0.9; A=1 in the top left corners of each page). The algorithm tried to minimize the mean-squared error by reducing the number of features in the model (top legend in upper right plot). The final number of features as well as the 'lambda.1se' at which the practically best performance was achieved are indicated as 'N=' and 'L=' in the top left corner. The right and left vertical dotted lines show absolute minimum lambda and 'lambda.1se' found within 1 standard error of the former, respectively. The chosen features with their linear coefficients are listed below (sorted by coefficient values; the lists are truncated when too long).</p> <p>The two bottom plots display model performance by matching drug sensitivity predicted for each cell line (X axes) on data used for training (blue points, left) and on newly obtained data from the ACT screen (green points, right). The model performance is measured with Spearman rank correlation between predicted and observed data points.</p> <p style="text-align: center;">See also the legend to Figure 5.</p> |
| glmnetModels.Basu_vs_new.pwnea.pdf | <p>Building and validation of multivariate models of drug resistance from PWNEA scores obtained by using point mutation and gene expression data.</p> <p style="text-align: center;">See the legend above.</p>                                                                                                                                                                                                                                                                                                                                                                                                                                                                                                                                                                                                                                                                                                                                                                                                                                                                                                                                                                                                                                                                                                                                                                                        |

1116

1117
